1 **Endothelial transmigration hotspots limit vascular leakage through**  
2 **heterogeneous expression of ICAM1**

3

4 Max L.B. Grönloh<sup>1,2,+</sup>, Janine J.G. Arts<sup>1,2,+</sup>, Sebastián Palacios Martínez<sup>1</sup>, Amerens A.  
5 van der Veen<sup>1</sup>, Lanette Kempers<sup>1</sup>, Abraham C.I. van Steen<sup>1</sup>, Joris J.T.H. Roelofs<sup>3</sup>,  
6 Martijn A. Nolte<sup>1</sup>, Joachim Goedhart<sup>2</sup>, Jaap D. van Buul<sup>1,2,\*</sup>

7

8 **Affiliations:**

9 <sup>1</sup>Molecular Cell Biology Lab at Dept. Molecular Hematology, Sanquin Research and Landsteiner  
10 Laboratory, Amsterdam, the Netherlands; <sup>2</sup>Leeuwenhoek Centre for Advanced Microscopy (LCAM),  
11 section Molecular Cytology at Swammerdam Institute for Life Sciences (SILS) at University of  
12 Amsterdam, Amsterdam, the Netherlands; <sup>3</sup>Amsterdam UMC, University of Amsterdam, Location AMC,  
13 Department of Pathology, Amsterdam Cardiovascular Sciences, Amsterdam, the Netherlands.

14

15 **+These Authors contributed equally**

16

17 **\*Correspondence should be addressed to:**

18 Jaap D. van Buul

19 Molecular Cell Biology Lab, Dept. Molecular Hematology

20 Sanquin Research and Landsteiner Laboratory

21 Academic Medical Center at the University of Amsterdam

22 Plesmanlaan 125, 1066CX Amsterdam, the Netherlands

23 Phone: +31205121219

24 E-mail: [j.vanbuul@sanquin.nl](mailto:j.vanbuul@sanquin.nl)

25

26 **Keywords: Transmigration hotspots, ICAM-1, ICAM-2, endothelium, vascular**  
27 **leakage, inflammation**

28

29 **Character count: 76343**

30

31 **Abstract**

32 Upon inflammation, leukocytes leave the circulation by crossing the endothelial monolayer at  
33 specific transmigration 'hotspot' regions. Although these regions support leukocyte  
34 transmigration, their functionality is not clear. We found that endothelial hotspots function to  
35 limit vascular leakage during transmigration events. Using the photo-convertible probe  
36 mEos4b, we traced back and identified original endothelial transmigration hotspots. Using this  
37 method, we show that the heterogeneous distribution of ICAM-1 determines the location of  
38 the transmigration hotspot. Interestingly, loss of ICAM-1 heterogeneity either by  
39 CRISPR/Cas9-induced knockout of ICAM-1 or equalizing the distribution of ICAM-1 in all  
40 endothelial cells results in loss of TEM hotspots but not necessarily in reduced TEM events.  
41 Functionally, loss of endothelial hotspots results in increased vascular leakage during TEM.  
42 Mechanistically, we demonstrate that the 3 extracellular Ig-like domains of ICAM-1 are crucial  
43 for hotspot recognition. However, the intracellular tail of ICAM-1 and the 4<sup>th</sup> Ig-like dimerization  
44 domain are not involved, indicating that intracellular signalling or ICAM-1 dimerization is not  
45 required for hotspot recognition. Together, we discovered that hotspots function to limit  
46 vascular leakage during inflammation-induced extravasation.

47

## 48 **Abbreviations**

- 49 BOEC: Blood Outgrowth Endothelial Cells  
50 BSA: Bovine Serum Albumin  
51 DMEM: Dulbecco's Modified Eagle Medium  
52 EGM: Endothelial Growth Medium  
53 FN: Fibronectin  
54 gRNA: Guide RNA  
55 HUVEC: Human Umbilical Vein Endothelial Cells  
56 ICAM-1/2: Intercellular Adhesion Molecule  
57 Ig: Immunoglobulin  
58 IFN: Interferon  
59 IL: Interleukin  
60 LFA-1: Lymphocyte-Associated Antigen 1  
61 LPS: Lipopolysaccharide  
62 Mac-1: Macrophage-1 Antigen  
63 PBS: Phosphate Buffering Solution  
64 P/S: Penicillin/Streptomycin  
65 SDM: Site-Directed Mutagenesis  
66 TBST: Tris-buffered saline with Tween 20  
67 TEM: Transendothelial Migration  
68 TNF: Tumor Necrosis Factor  
69 VCAM-1: Vascular Cell Adhesion Molecule 1  
70 VWF: von Willebrand Factor  
71

## 72 Introduction

73 The migration of leukocytes towards sites of infection or tissue damage is key to the  
74 inflammatory response of the innate immunity. To reach the underlying tissue, leukocytes exit  
75 the circulation through a process called transendothelial migration (TEM). TEM consists of  
76 several subsequent steps, known as the multistep process, introduced by Butcher and  
77 Springer, and although the basis of this concept is still very solid, new details still are  
78 discovered and characterized, adding to the full picture of the multistep paradigm<sup>1-6</sup>.

79 It is recognized that during inflammation, when leukocytes extravasate, vessels do not  
80 leak<sup>2,7</sup>. Work by our group and others showed that the gaps induced by the penetrating  
81 leukocytes are quickly repaired by a variety of intracellular processes within the endothelium  
82 itself<sup>8-10</sup>. Intravital microscopy revealed that neutrophil migration through the endothelial  
83 monolayer and the basement membrane and pericyte sheath does not occur randomly, but in  
84 fact occurs at predefined exit sites, called “hotspots”<sup>11</sup>. Although it is without a doubt that  
85 leukocytes use hotspots to cross the endothelium and many factors have been proposed to  
86 determine hotspot composition and localization<sup>12</sup>, the physiological relevance why leukocytes  
87 would prefer to cross the endothelium at hotspots is unclear. Examples of hotspot regulators  
88 are heterogenous chemokine gradients<sup>13,14</sup>, differences in substrate stiffness<sup>15,16</sup>, junction  
89 phenotype<sup>17</sup> and recently reported varying junctional membrane protrusion activities between  
90 individual endothelial cells<sup>18</sup> and autophagy at junction regions<sup>19</sup>. Additionally, the composition  
91 and density of the pericyte sheath and the basement membrane layer may also influence the  
92 location of both endothelial and basement membrane hotspots<sup>20,21</sup>.

93 As endothelial adhesion molecules are important regulators of efficient neutrophil  
94 TEM, this protein family may also play a role in the localization of TEM hotspots. Intercellular  
95 adhesion molecule (ICAM)-1 and ICAM-2, both heavily involved in neutrophil adhesion, are  
96 transmembrane glycoproteins of the immunoglobulin superfamily and in particular ICAM-1 is  
97 highly upregulated on inflamed endothelium<sup>22</sup>. ICAM-1 has several splicing variants, but  
98 generally consists of 5 extracellular immunoglobulin (Ig)-like domains, the fourth one  
99 regulating homodimerization<sup>23,24</sup>. ICAM-2 has just two Ig-like domains, which are homologues  
100 to the first and second Ig-like domains of ICAM-1<sup>25</sup>. Both ICAM-1 and ICAM-2 bind neutrophil  
101 integrins lymphocyte function associated antigen 1 (LFA-1) (CD11a/CD18) and macrophage-  
102 1 antigen (Mac-1) (CD11b/CD18) and are mainly involved in the firm adhesion and crawling  
103 steps of the endothelium<sup>26,27</sup>. LFA-1 has been reported to bind to the first extracellular domains  
104 of ICAM-1 and ICAM-2<sup>28,29</sup>. Mac1 binds the third extracellular domain of ICAM-1, whereas  
105 information on association between Mac1 and ICAM-2 is scarce<sup>30</sup>. Both ICAM-1 and -2 are  
106 linked to the actin cytoskeleton via modulators such as  $\alpha$ -actinin-4, filamin B and cortactin<sup>31,32</sup>.  
107 After inflammation, ICAM-1 is upregulated and displays a typical patchy pattern *in vitro* as well

108 as *in vivo*<sup>33-35</sup>. In contrast to ICAM-1, ICAM-2 is already constitutively expressed on the  
109 endothelium in normal conditions<sup>36</sup>.

110 The biological relevance of TEM hotspots is not yet understood. It has been  
111 hypothesized that the interaction of leukocytes with only a small selection of the vessel could  
112 help maintain the barrier integrity of the endothelium<sup>11</sup>, but no evidence in favour of this theory  
113 has been put forward. It has been shown that transmigration of neutrophils is not correlated  
114 with local leakage at those specific sites, as mechanisms exist to limit transmigration-induced  
115 vascular leakage<sup>9,10</sup>. Other studies have shown that leukocyte adhesion to the endothelium  
116 itself can already trigger vascular leakage<sup>37</sup>, suggesting that adhesion-related processes, and  
117 not diapedesis-related ones, can be associated with vascular leakage.

118 Here, we reveal the biological relevance of neutrophil TEM hotspots in the endothelial  
119 monolayer by establishing a molecular link between endothelial hotspots that are regulated by  
120 ICAM-1 distribution and vascular leakage. Mechanistically, we show that ICAM-1  
121 heterogeneity is crucial for the presence of TEM hotspots. Loss of ICAM-1 heterogeneity either  
122 by CRISPR/Cas9 knockout or distributing and expressing ICAM-1 at equal levels in all  
123 endothelial cells results in loss of TEM hotspots but not in altered neutrophil adhesion or  
124 diapedesis efficacy. Interestingly, we found under these conditions an increase in vascular  
125 leakage during TEM. Hotspot functionality and recognition depends on the first 3 extracellular  
126 Ig-like domains of ICAM-1 but not on its intracellular tail or the 4<sup>th</sup> Ig-like dimerization domain.  
127 This indicates that intracellular signalling or ICAM-1 dimerization is not required for hotspot  
128 functionality and recognition. Restoration of the heterogeneous distribution of ICAM-1 rescued  
129 the increase in local permeability during diapedesis.

130 Thus, our study reveals the functional importance of endothelial heterogeneity of  
131 adhesion molecules in regulating TEM hotspots under inflammatory conditions and these  
132 hotspots function to limit vascular leakage during leukocyte extravasation.

## 133 **Results**

### 134 **Transmigration hotspots exist *in vitro***

135 *In vivo* data show that leukocytes prefer local exit sites, named transendothelial  
136 migration (TEM) hotspots, although the functionality of the hotspots is not clear<sup>11</sup>. To  
137 investigate the functionality of hotspots, we first need to confirm that these hotspots also exist  
138 *in vitro*. Neutrophil transmigration was studied under physiological flow conditions using tumor  
139 necrosis factor (TNF)- $\alpha$ -stimulated human umbilical vein endothelial cells (HUVEC). We  
140 observed that neutrophils prefer to leave the endothelium at specific sites, while almost  
141 completely ignoring other areas (Figure 1A). To quantify if more than one neutrophil preferred  
142 the same endothelial area to transmigrate, we used an unbiased 'nearest neighbour' analysis,  
143 a method very suitable to detect clustering of spatial data. We calculate the mean distance of  
144 each transmigration event to three transmigration events that were nearest and compared this  
145 to a same number of randomly generated spots (Figure 1B). Indeed, a significant decrease in  
146 the average distance to the 3 nearest transmigration events compared to the randomized  
147 spots was found, indicative for the existence of preferred endothelial hotspots that regulate  
148 transmigration events (Figure 1C & S1A). To check if the number of neighbours used in the  
149 analysis did not influence the outcome, we also analysed transmigration events that were  
150 closest to one, five and nine nearest transmigration events and found similar patterns (Figure  
151 S1B). Thus, from these quantitative analyses, we conclude that TEM hotspots also exist *in*  
152 *vitro*.

153 To study whether neutrophils at TEM hotspots displayed different spatiotemporal  
154 crawling dynamics compared to neutrophils that ignored hotspots, we classified neutrophil  
155 crawling tracks in physiological flow time-lapse recordings and classified a 'hotspot track' when  
156 a neutrophil would transmigrate within 50  $\mu\text{m}$ , the average diameter of one endothelial cell of  
157 another neutrophil (Figure S1C). We found that around 75% of all TEM events occurred at a  
158 hotspot location (Figure 1D). Moreover, neutrophils that used TEM hotspots crawled for  
159 shorter distances and shorter durations than neutrophils that did not undergo diapedesis at  
160 hotspots, although migration speed and crawling linearity were not altered (Figure 1E-J).  
161 Combined, these data indicate that TEM occurs more frequently and is more efficient at  
162 endothelial hotspots.

163

### 164 **ICAM-1 marks neutrophil TEM hotspots**

165 To understand how neutrophils find these hotspots, we need to be able to identify  
166 endothelial TEM hotspots once neutrophils have used them. To do so, endothelial cells (ECs)  
167 were transfected with the photoconvertible probe mEos4b and neutrophil TEM under flow was  
168 monitored in real time. Sites of TEM were determined on the fly and marked as field of view

169 (FOV). FOV were exposed to 405 nm light, converting mEos4b to a red fluorescent protein.  
170 The red fluorescence allowed us to trace back and identify original TEM hotspots to screen  
171 for candidate adhesion molecules (Figure 2A). Using this technique, we found that the  
172 distribution of ICAM-1 perfectly correlated with TEM hotspots, whereas VCAM-1 and ICAM-2  
173 did not (Figure 2B).

174 To validate these observations, we identified individual ECs, stained them for ICAM-1,  
175 -2 or VCAM-1 and ranked them by fluorescence intensity, representing surface protein  
176 expression levels. Next, we correlated TEM sites to fluorescence intensity, plotted all TEM  
177 events, and discriminated between neutrophils that transmigrated (marked with yellow  
178 asterisks) and neutrophils that did adhere to the endothelium, but detached again (marked  
179 with magenta asterisks) (Figure 2A). These data showed that most adhesion events that led  
180 to successful TEM required ICAM-1<sup>high</sup> ECs (Figure 2C). Interestingly, we also found a  
181 preference for ICAM-2<sup>high</sup> ECs, albeit less prominent (Figure 2C), suggesting that neutrophils  
182 can differentiate between high and low ICAM-2-expressing ECs. Neutrophil adherence to  
183 VCAM-1 was completely random, underscoring the fact that neutrophils did not express  
184 VCAM-1-counter receptor VLA-4 (Figure 2C). These unbiased data indicate that ICAM-1  
185 marks TEM hotspots.

186

### 187 **Heterogeneous distribution of endothelial adhesion molecules**

188 Based on the strong correlation between ICAM-1<sup>high</sup> expression and TEM hotspots, we  
189 hypothesize that the heterogeneous expression of endothelial ICAM-1 leads to increased  
190 neutrophil adhesion and thus TEM at those sites. To examine adhesion molecule distribution  
191 within an inflamed endothelial monolayer in more detail, we stained TNF- $\alpha$ -treated ECs for  
192 ICAM-1, ICAM-2 and VCAM-1 and found that ICAM-1 expression is distributed in a  
193 heterogenous manner: some ECs displayed high levels of ICAM-1, whereas others did not  
194 (Figure 3A). Furthermore, ICAM-1 localized to apical filopodia<sup>38,39</sup>, but this was only observed  
195 in ICAM-1<sup>high</sup> ECs. In contrast to ICAM-1, ICAM-2 showed a much more homogenous  
196 distribution within the endothelial monolayer and was slightly enriched at junction areas but  
197 not at filopodia (Figure 3A). Finally, VCAM-1 did show heterogenous expression and was  
198 enriched in filopodia on ECs that showed VCAM-1<sup>high</sup> expression (Figure 3A). To quantify  
199 heterogeneous distribution, we measured fluorescence intensity of individual ECs and  
200 normalized the fluorescent values within each field of view to correct for variation between  
201 images. Indeed, ICAM-1 and VCAM-1 showed a wide distribution of the violin plot, indicating  
202 increased heterogeneous distribution, with nuclei staining as maximal equal distribution  
203 (Figure 3B). This quantification allowed us to measure the variation of protein distribution  
204 within one EC monolayer. ICAM-1 and VCAM-1 showed strong heterogenous distribution,  
205 whereas ICAM-2 only showed minor heterogeneous distribution in a EC monolayer (Figure



206 3C). As ICAM-1 and VCAM-1 expression are both induced upon inflammation, we analysed  
207 whether ICAM-1 and VCAM-1 heterogeneity was correlated. Co-staining of ICAM-1 with either  
208 ICAM-2 or VCAM-1 showed no correlation between ICAM-1 and ICAM-2 ( $r = 0.044$ ,  $p = 0.072$ )  
209 (Figure S2A). A weak positive correlation was found for ICAM-1 and VCAM-1 ( $r = 0.532$ ,  $p <$   
210  $0.001$ ), even though we also observed significant populations of ICAM-1<sup>high</sup>/VCAM-1<sup>low</sup> and  
211 ICAM-1<sup>low</sup>/VCAM-1<sup>high</sup> ECs (Figure S2B). To study whether our findings were specific for TNF-  
212  $\alpha$  treatment, we treated ECs with other inflammatory mediators such as Lipopolysaccharide  
213 (LPS), Interferon (IFN)- $\gamma$  and Interleukin (IL)-1 $\beta$ . The results revealed that under any  
214 inflammatory stimulus tested, ICAM-1 and VCAM-1 showed strong heterogeneous distribution  
215 whereas ICAM-2 only showed minor heterogeneous distribution (Figure S2C).

216 To explore whether heterogeneous distribution of adhesion molecules in the inflamed  
217 EC monolayer changed over time, we allowed EC monolayers to mature for multiple days,  
218 ranging from 2 to 4 days, before treating with TNF- $\alpha$ . No change in the degree of heterogeneity  
219 of any of the adhesion molecules measured was found (Figure S2D). Using a vessel-on-a-  
220 chip model, developed by our lab<sup>40</sup>, we confirmed ICAM-1 heterogeneous distribution in a 3D  
221 inflamed vessel (Figure 3D and S2E). Clinically obtained samples of chronically inflamed  
222 human mesentery of inflammatory bowel disease patients showed ICAM-1 cell-to-cell  
223 heterogeneity in small veins (Figure 3E). Non-inflamed control tissue of the same organ,  
224 derived from intestinal carcinoma patients showed no ICAM-1 expression, but *ex vivo*  
225 treatment with TNF- $\alpha$  for 4h showed upregulation and heterogeneous distribution of ICAM-1  
226 (Figure S2F). Together, these data show that heterogeneity of adhesion molecules is broadly  
227 conserved upon different conditions.

228

### 229 **ICAM-1 heterogeneity determines TEM hotspots**

230 The functional existence of TEM hotspots is not clear. To understand this better, we  
231 focused on the major TEM hotspot marker ICAM-1 and generated stable ICAM-1 knockout  
232 (KO) ECs using Crispr/Cas9. In addition, we also generated ICAM-2 and ICAM-1/2 double  
233 knock out ECs. As HUVECs are limited by lifespan and passage time, we used blood  
234 outgrowth endothelial cells (BOECs) isolated from umbilical cord blood. These cells  
235 correspond to the characteristics ascribed to ECs and can be kept in culture for several  
236 passages<sup>41</sup>. Successful KO of ICAM-1 and -2 in ECs under TNF- $\alpha$  stimulation was confirmed  
237 by Western blotting (Figure S3A-C) and sequencing (Figure S3D). ICAM-1 KO did not  
238 influence ICAM-2 distribution compared to control ECs and ICAM-2 KO ECs still showed  
239 ICAM-1 heterogeneity (Figure S4A-B). Surprisingly, we found only a slight, non-significant  
240 decrease in neutrophil adhesion to ICAM-1-deficient ECs under flow conditions (Figure 4A).  
241 These data are in line with studies that used blocking antibodies against ICAM-1<sup>42-44</sup>. Depletion  
242 of ICAM-2 also did not alter neutrophil adhesion (Figure 4A). Interestingly, double KO ECs did



243 show a 50% reduction of adhesion (Figure 4A). We did not find any effects on neutrophil  
244 diapedesis efficacy, as consistently around 80% of adhered neutrophils underwent  
245 diapedesis, indicating that ICAM-1 and/or -2 are not directly regulating neutrophil diapedesis  
246 (Figure 4B). Additionally, no effect on neutrophil crawling length, duration or speed was  
247 measured in any of the conditions (Figure S4C-E). Interestingly, when quantifying TEM  
248 hotspot events, we found a loss of TEM hotspots for neutrophils that adhered and crossed  
249 ICAM-1<sup>-/-</sup> but not to ICAM-2<sup>-/-</sup> EC monolayers (Figure 4C). This was found for the single as  
250 well as for the double KO conditions (Figure 4C).

251 To confirm that heterogeneous distribution of ICAM-1 is crucial to induce TEM  
252 hotspots, we rescued the heterogeneous distribution of ICAM-1 in EC monolayers by  
253 overexpressing ICAM-1 in ICAM-1/ICAM-2 double KO-ECs in a mosaic fashion (Figure 4E  
254 and S4F). Interestingly, 90% of all neutrophils adhered to ICAM-1-GFP-expressing ECs but  
255 not to the KO-ECs (Figure 4F). Neutrophils also showed a preference for ICAM-2-expressing  
256 ECs, albeit less prominent compared to ICAM-1 (Figure 4F). Combining ICAM-1 and ICAM-2  
257 heterogeneity showed that there was a small preference for ICAM-1 over ICAM-2 (Figure 4F).  
258 The membrane-marker CAAX was used as a control and did not affect the preference for  
259 adhesion (Figure 4F). These data indicate that ICAM-1 triggers TEM hotspots.

260

### 261 **TEM hotspots function to limit vascular leakage during TEM.**

262 One of the consequences of TEM hotspots is that less areas in the EC monolayer are  
263 penetrated by transmigrating neutrophils and consequently, the EC monolayer integrity can  
264 be maintained. Therefore, we hypothesized that TEM hotspots function to limit vascular  
265 leakage during TEM events. To test this, we measured permeability and neutrophil TEM  
266 simultaneously across ICAM-1/2 single and double KO-ECs using Transwell systems. No  
267 basal leakage was measured in any of the KO ECs when no neutrophils were present (Figure  
268 5B and S5B). When measuring permeability during neutrophil TEM under control conditions,  
269 we did not find any change in permeability. However, we did measure an increase in EC  
270 permeability when neutrophils crossed EC monolayers that were deficient for ICAM-1 (Figure  
271 5A-B). We also found an increase in permeability when neutrophils crossed the ICAM-1/2 KO  
272 EC monolayers, whereas permeability was only slightly increased when neutrophils crossed  
273 ICAM-2-deficient ECs (Figure 7A-B). TEM of neutrophils through these monolayers was  
274 consistent with TEM under flow experiments (Figure S5A and Figure 4A). These data indicate  
275 that TEM hotspots functionally protect endothelial monolayer integrity from leakage during  
276 TEM.

277 To examine the effect of limiting leakage during TEM by reducing the heterogeneous  
278 expression of *endogenous* ICAM-1, we sorted the top 5% ICAM-1-expressing ECs, referred  
279 to as ICAM-1<sup>high</sup> (Figure 5C). Indeed, the ICAM-1<sup>high</sup> EC population displayed lower

280 heterogeneity compared to control ECs (Figure S5C). As the antibody used for cell-sorting  
281 may interfere with neutrophil TEM, we tested its inhibitory properties. We observed no effect  
282 on adhesion, TEM and neutrophil crawling dynamics when the antibody was incubated for 24  
283 hours, the same time the ECs are in contact with the antibody in the sorting experiments  
284 (Figure S5D-I). Using TEM flow assays, we observed that ICAM-1<sup>high</sup> ECs showed increased,  
285 albeit non-significant, adhesion compared to control ECs (Figure 5D). Diapedesis efficacy was  
286 unaltered when comparing ICAM-1<sup>high</sup> with control ECs (Figure 5E). However, when  
287 quantifying adhesion and diapedesis hotspots, we found that neutrophils showed less  
288 clustered transmigration patterns on ICAM-1<sup>high</sup> ECs compared to control ECs (Figure 5F). In  
289 line with these results, permeability assays demonstrated that EC leakage upon neutrophil  
290 TEM was increased in homogenous ICAM-1<sup>high</sup>-sorted ECs, in which no hotspots were  
291 detected (Figure 5H-I and Figure S5J-K). Thus, these data show that endogenous ICAM-1  
292 heterogeneity is responsible for establishing functional TEM hotspots in the endothelium that  
293 limit vascular leak during TEM.

294

### 295 **The integrin binding domains of ICAM-1 are required for functional TEM** 296 **hotspots.**

297 Neutrophils use integrins LFA-1 or Mac-1 to bind to ICAM-1 and ICAM-2, both using  
298 different epitopes. To study in more detail which of these epitopes are crucial for establishing  
299 functional TEM hotspots, we generated deletion mutants of ICAM-1, lacking one or more of  
300 the extracellular Ig-like domains. All deletion mutants for ICAM-1 were expressed in a  
301 heterogenous manner in ICAM-1 KO ECs and stained, on non-permeabilized samples, with  
302 an ICAM-1 antibody directed against the first Ig-like domain, showing normal distribution in  
303 apical filopodia (Figure S6A). To study which domains are crucial for TEM hotspot  
304 determination, we re-expressed these truncations in ICAM-1/2 KO-ECs and found that the  
305 lack of Ig-like domain 1 or 1-2 caused a mild decrease in TEM hotspots (Figure 6A). A similar  
306 decrease was observed when Ig-like domain 3 was depleted (Figure 6A). Interestingly, no  
307 TEM hotspot preference was measured when the first 3 Ig-like domains were deleted (Figure  
308 6A). Ig-like domain 4, known for ICAM-1 dimerization<sup>24</sup>, had no effect on TEM hotspot  
309 preference (Figure 6A). Interestingly, deletion of the intracellular tail of ICAM-1, known to  
310 induce TEM-mediated signals<sup>45-46</sup>, did not influence hotspot recognition. These data showed  
311 that the first 3 Ig-like domains, the LFA-1 and Mac-1 epitopes of ICAM-1 are crucial for TEM  
312 hotspot determination and that ICAM-1 dimerization as well as intracellular signalling induced  
313 by the intracellular tail of ICAM-1 are not involved.

314 To study whether the observed increase in permeability in previous experiments is due  
315 to the loss of ICAM-1-mediated TEM hotspots, we measured permeability during TEM across

316 ICAM-1-deficient EC monolayers that were rescued with truncated mutants. ICAM-1-KO ECs  
317 that expressed the ICAM-1 mutant lacking the first 3 Ig-like domains ( $\Delta 123$ ) showed a  
318 significant increase in leakage compared to ICAM-1-FL rescue conditions (Figure 6B-C). Total  
319 number of neutrophils that crossed the endothelial monolayers under these conditions was  
320 only marginally reduced (Figure S6B). Note that the ICAM-1 mutant that lacked the intra  
321 cellular tail did not show any increase in permeability. However, the number of neutrophils that  
322 crossed this monolayer were reduced, line with current literature (Figure S6B)<sup>39</sup>. None of the  
323 EC monolayers that expressed ICAM-1 mutants showed any basal leakage in the absence of  
324 neutrophils (Figure S6C).

325 Taken together, these data suggest that the binding of leukocytic integrins to  
326 endothelial ICAM-1 are required for TEM hotspot recognition. As a functional  
327 consequence, the existence of hotspots limits vascular permeability during TEM.

328

## 329 Discussion

330 The existence of TEM hotspots has been recognized *in vivo*<sup>11</sup>, but there is no evidence  
331 for their biological relevance, nor is there clear consensus on the mechanism for hotspot  
332 recognition by leukocytes<sup>12</sup>. In this work, we use live-imaging and newly developed  
333 computational methods for the analysis of hotspots, providing new insight that addresses  
334 these questions. Our work confirms that TEM hotspots can also be found *in vitro*. As for the  
335 physiological relevance, we show for the first time that these hotspots on the endothelial  
336 monolayer limit vascular leakage during TEM. Mechanistically, this study shows that the first  
337 3 extracellular Ig-domains of ICAM-1 are crucial for hotspot recognition.

338 Neutrophil TEM hotspots were first described *in vivo*, where the involvement of LFA-1  
339 and Mac1 in different TEM phases was shown<sup>11</sup>. This study introduced the terms ‘Hotspot I’  
340 for transendothelial migration hotspots and ‘Hotspot II’ for hotspots in the pericyte and  
341 basement membrane layer. In agreement with this study, we show that ICAM-1, ligand for  
342 LFA-1 and Mac-1, is involved in ‘Hotspot I’, resulting in local TEM.

343 Our major finding lies in the fact that TEM hotspots function to limit vascular leakage  
344 during TEM. The endothelium uses heterogeneous distribution of ICAM-1 to induce TEM  
345 hotspots for leukocytes. The basis of TEM hotspots is the initial adhesion of the leukocytes  
346 top the endothelium, particularly driven by ICAM-1. Depletion of ICAM-1 does not hamper  
347 efficient TEM but does increase vascular leakage during TEM. Previously, we showed that a  
348 F-actin-rich ring acts like an elastic strap around the penetrating leukocyte to limit permeability  
349 during TEM<sup>10</sup>. This F-actin ring is under tension as it needs local activity of the small GTPase  
350 RhoA and downstream myosin activity. Our work furthermore indicated a role for ICAM-1  
351 upstream from RhoA activation, albeit we were unable to directly link ICAM-1 function to the

352 formation of the F-actin ring. We now find that ICAM-1 is crucial in the formation of TEM  
353 hotspots and thereby reduces local permeability. However, the ICAM-1  $\Delta C$  mutant shows that  
354 it is the disappearance of hotspots, and not the lack on downstream signalling towards the  
355 RhoA-mediated pore closure, that causes vascular leakage. These data indicate that the  
356 formation of the F-actin ring and the recognition of TEM hotspots through ICAM-1 distribution  
357 are uncoupled.

358 Other groups have identified signalling pathways in the endothelium that lead to the  
359 closure of the endothelial gap that is induced by the penetrating leukocyte. Braun and  
360 colleagues elegantly showed that platelet-derived Ang1 activates the endothelial Tie2  
361 receptor, resulting in local activation of the FGD5-Cdc42 axis and closure of the gap<sup>9</sup>. Martinelli  
362 and colleagues have shown that local Rac1 activities are involved in the release of cellular  
363 tension signals that induce self-restorative ventral lamellipodia to heal barrier micro-wounds<sup>47</sup>.  
364 These mechanisms may all be triggered when leukocytes penetrate the endothelial  
365 monolayer<sup>12,48</sup>. From a more efficient and energy saving cellular perspective, it makes sense  
366 to concentrate and minimize such signalling pathways to be able to keep the integrity of the  
367 vascular wall as good as possible.

368 We have compared neutrophil crawling dynamics around endothelial hotspots areas  
369 with non-hotspot areas. This revealed that neutrophils that used TEM hotspots showed much  
370 shorter crawling tracks. We hypothesize that these differences are due to higher ICAM-1  
371 expression that capture neutrophils on the spot more efficiently. However, as we do not see  
372 extended crawling tracks on ICAM-1 KO ECs, it is likely that other factors are also involved,  
373 potentially regulated by leukocytes themselves. An interesting hypothesis to explore further  
374 involves the ability of neutrophils to leave behind ‘membrane trails’ that support migration of  
375 subsequent leukocytes<sup>49</sup>.

376 Surprisingly, our results show that in ICAM-1-depleted EC monolayers, the effect on  
377 total adhesion and transmigration is minimal. Only when both ICAM-1 and -2 are depleted, a  
378 clear decrease in neutrophil adhesion and therefore transmigration was observed, confirming  
379 earlier hypotheses that ICAM-1 and ICAM-2 have partly overlapping roles during TEM<sup>50</sup>. But  
380 importantly, our work adds new information to the separate roles of ICAM-1 and ICAM-2 in  
381 TEM. By overexpressing both adhesion molecules in a mosaic fashion, we show a preference  
382 for ICAM-1 over ICAM-2 for adhesion of neutrophils. This preference may be a result of the  
383 reported higher binding affinity of ICAM-1 with LFA-1<sup>48</sup>. Alternatively, ICAM-1 is enriched in  
384 apical filopodia that extend into the lumen and thus readily accessible for the rolling leukocyte,  
385 which is not the case for ICAM-2.

386 In this study, we highlight the significance of heterogeneous distribution of adhesion  
387 molecule protein expression within the endothelial monolayer for barrier integrity during TEM.  
388 Heterogeneous distribution of adhesion molecule such as ICAM-1 upon inflammation is

389 broadly recognized and found *in vivo*<sup>35</sup>. Remarkably, based on our results, there does not  
390 seem to be a general correlation of heterogeneity between two inflammation-upregulated  
391 adhesion molecules ICAM-1 and VCAM-1, suggesting a more intricate mechanism that may  
392 work differently for each protein and each leukocyte subset. Earlier research has already  
393 provided clues at the epigenetic level: heterogeneity of well-known endothelial protein von  
394 Willebrand factor (VWF) is dependent on noise-induced changes in DNA methylation of the  
395 *VWF* promoter<sup>51</sup>, whereas VCAM-1 mosaic expression is due to heterogenous states of  
396 *VCAM-1* promoter methylation states<sup>52</sup>.

397 In conclusion, we have discovered how the endothelium takes advantage of adhesion  
398 molecule heterogeneous distribution within the endothelial monolayer by introducing TEM  
399 hotspots for leukocytes that function to limit vascular leakage during diapedesis and therefore  
400 maintain vascular integrity.

401

## 402 **Methods**

### 403 **Plasmids**

404 ICAM-1-GFP was described earlier<sup>38</sup> and cloned into a lentiviral pLV backbone using SnaBI  
405 (ThermoFisher, FD0404) and XbaI (ThermoFisher, FD0684) / NheI (ThermoFisher, FD0973).  
406 To generate ICAM-1 truncated sequences, Gibson cloning (NEB) was performed on the pLV-  
407 ICAM-1-GFP plasmid. All constructs contain GFP as FP and the ICAM-1 signal peptide,  
408 consisting of amino acids Met1 to Ala27. ICAM-1  $\Delta$  1 is truncated from Gln28 to Val109; ICAM-  
409 1  $\Delta$  12 has a deletion from Gln28 to Phe212; ICAM-1  $\Delta$  123 lacks Gln28 to Ile307; ICAM-1  $\Delta$  3  
410 is truncated from Val213 until Ile307; ICAM-1  $\Delta$  4 lacks Pro311 to Arg391; ICAM-1  $\Delta$  C  
411 terminates at Asn504. pLV-ICAM-2-mKate was constructed and packaged by VectorBuilder  
412 (Vector ID is VB200624-1164vtm). pLV-mNeonGreen-Caax and pLV-mScarletI-CAAX have  
413 been described earlier by us<sup>18</sup>. mEos4b-N1 was a gift from Micheal Davidson (Addgene #  
414 54814; <http://n2t.net/addgene:54814>; RRID:Addgene\_54814)<sup>53</sup>. mEos4b was PCR'ed out of  
415 the mEos4b-N1 vector, after which it was ligated into a pLV backbone using SnaBI and  
416 XbaI/NheI. All primers used in cloning are shown in Table 1.

417

### 418 **Antibodies**

419 Alexa Fluor 647-conjugated ICAM-1 mouse monoclonal antibody was purchased from AbD  
420 Serotec (MCA1615A647T) (IF and FACS 1:400). Alexa Fluor 546-conjugated ICAM-1 mouse  
421 monoclonal antibody was bought from Santa Cruz (sc-107 AF546) (IF 1:400 Vessel-on-a-chip  
422 1:200 whole-mount stain 1:100). FITC-conjugated ICAM-1 mouse monoclonal antibody was  
423 purchased from R&D (BBA20) (FACS 1:100). ICAM-1 rabbit polyclonal antibody was  
424 purchased from Santa Cruz (SC-7891) (WB 1:1000). ICAM-2 monoclonal mouse antibody was



425 purchased from Invitrogen (14-1029-82) (IF 1:200). PE-conjugated ICAM-2 monoclonal  
426 mouse antibody was bought from BD (558080) (FACS 1:200). ICAM-2 rabbit monoclonal  
427 antibody was bought from Invitrogen (MA5029335) (WB 1:500). VCAM-1 monoclonal mouse  
428 antibody was purchased from Merck (MAB2511). Alexa Fluor 647-conjugated PECAM-1  
429 monoclonal mouse antibody was bought from BD (561654) (whole-mount stain 1:200). Alexa  
430 Fluor 647-conjugated VE-cadherin mouse antibody was purchased from BD (561567)  
431 (Vessel-on-a-chip 1:200). Alexa Fluor 488-conjugated polyclonal chicken anti-mouse antibody  
432 (A21200) (IF 1:200) and Alexa Fluor 647-conjugated polyclonal chicken anti-mouse antibody  
433 (A21463) (IF 1:200) were purchased from Invitrogen. Alexa Fluor 488 phalloidin was  
434 purchased from Invitrogen (whole-mount stain 1:200). Hoechst 33342 (IF, vessel-on-a-chip  
435 and whole mount stain 1:50.000) was purchased from Molecular Probes (H-1399). Mouse  
436 monoclonal actin antibody for western blot (1:2500) was purchased from Sigma (A3853).  
437 Donkey anti-rabbit IRDye 800 (926-32213) (WB 1:5000) and donkey anti-mouse 680 (926-  
438 68022) (WB 1:5000) were purchased from LI-Cor. All antibodies were used according to  
439 manufacturer's protocol.

440

#### 441 **Cell culture and treatments**

442 HUVEC were purchased from Lonza (C2519A) and cultured on fibronectin (FN)-coated dishes  
443 in Endothelial Growth Medium 2 (EGM-2) supplemented with singlequots (Promocell, C-  
444 22011) and 100 U/mL penicillin and streptomycin (P/S) at 37°C in 5% CO<sub>2</sub>. HUVEC were  
445 cultured up to passage 7 and never allowed to grow above 70% confluency before the start of  
446 an experiment. Blood outgrowth endothelial cells (BOEC) were isolated from umbilical cord  
447 blood according to this protocol<sup>41</sup>. BOEC were grown on 0.1% gelatin-coated dishes during  
448 outgrowth and during experiments in EGM-2 supplemented with singlequots, 100 U ml<sup>-1</sup> P/S  
449 and 18% fetal calf serum (Bodinco, Alkmaar, The Netherlands) at 37°C in 5% CO<sub>2</sub>. HUVECs  
450 and BOECs were inflamed with 10 ng/mL recombinant TNF- $\alpha$  (Peprotech, 300-01A), 10 ng/mL  
451 IL-1 $\beta$  (Peprotech, 200-01B), 0.5 ng/mL IFN- $\gamma$  (R&D, 285-IF-100) or 10 ng/mL LPS (Sigma,  
452 L2880) 20 hours before an experiment.

453 HEK-293T (ATCC) were cultured in Dulbecco's Modified Eagle Medium (DMEM)  
454 (Gibco, 41965-039) containing 10% fetal calf serum, 100 U/mL P/S. By transfection of third  
455 generation lentiviral packaging plasmids with TransIT (Mirus, Madison, WI, USA) according  
456 to the manufacturers protocol, lentiviral particles containing pLV plasmids were generated.  
457 The second and third day after transfection, lentivirus-containing supernatant was harvested,  
458 filtered (0.45 micron) and concentrated with Lenti-X concentrator (Clontech, 631232). Virus  
459 was added to HUVEC or BOECs 1:250 to 1:500, depending on the efficacy of the virus. In  
460 case all cells were required to express the plasmid, a 2-day 1.5  $\mu$ g/mL puromycin (InvivoGen,

461 ant-pr-1) selection was performed. Endothelial cells were used in assays at least 72 hours  
462 after initial transduction.

463

### 464 **Generating ICAM knockout BOEC**

465 ICAM-1 and ICAM-2 knockout BOEC were generated using guide RNAs (gRNAs)  
466 GCTATTCAAAGTCCCTGAT (ICAM-1) and GAGGTATTCGAGGTACACGTG (ICAM-2) that  
467 were ligated into a lentiviral Crispr vector (LentiCRISPRv2) containing Cas9 that was digested  
468 with BsmBI (ThermoFisher, FD0454) gRNA were designed using Crispr<sup>54</sup>. For ICAM-1, we  
469 targeted exon 2. For ICAM-2, we targeted exon 4. As a negative control, the CRISPR vector  
470 without a gRNA was used. Virus was produced and transductions in cord blood (BOEC were  
471 performed as described above. Transduced cells were selected using 1.5 µg/mL puromycin  
472 for 2 days, after which cells were single cell sorted into 96-well plates coated with 0.1% gelatin  
473 with an BD FACS Aria™ III Cell Sorted (BD). For ICAM-2 knockout and for the ICAM-1/2  
474 double knockout, ICAM-2 negative cells were sorted. For control gRNA, single cells positive  
475 for ICAM-2 were sorted. Since ICAM-1 only get expressed in inflammatory conditions, and  
476 BOECs stop growing after receiving inflammatory treatments, it was not possible to sort ICAM-  
477 1 knockout candidates with a fluorescent selection. Single cells were sorted and all  
478 monoclonal populations were tested for ICAM-1 expression when they reached around  
479 100.000 cells, after which only the ICAM-1 lacking cell lines were kept in culture. Correct  
480 knockouts were, Western blot, FACS and genomic DNA extraction followed by sequencing  
481 using a DNeasy Blood & Tissue Kit (Qiagen, 69504) (Figure S3).

482

### 483 **Neutrophil isolation**

484 Polymorphonuclear neutrophils were isolated from whole-blood, extracted from healthy  
485 voluntary donors that signed informed consent according to the rules maintained by the  
486 Sanquin Medical Ethical Committee, which are based on rules and legislation in place within  
487 The Netherlands. The rules and legislations were based on the Declaration of Helsinki  
488 (informed consent for participation of human subjects in medical and scientific research) and  
489 guidelines for Good Clinical Practice. Blood was always processed within 2 hours after  
490 donation. Whole blood is diluted 1:1 with 5% TNC in Phosphate Buffering Solution (PBS)  
491 (Fresenius Kabi, Zeist, The Netherlands) and pipetted on 12.5 mL Percoll (1.076 g/ml). Next,  
492 a 20-minute centrifugation (Rotina 420R) at 800xg with a slow start and no brake was  
493 performed on the diluted blood. After discarding the monocyte- and lymphocyte-containing  
494 ring fraction, 45 mL ice-cold erythrocyte lysis buffer (155 mM NH<sub>4</sub>CL, 10 mM KHCO<sub>3</sub>, 0.1 mM  
495 EDTA, pH7.4 in Milli-Q (Gibco, A1283-01)) was added to the pallet to lyse erythrocytes for 15  
496 minutes. Erythrocyte lysis was performed twice, with a centrifuge step at 500xg for 5 min at



497 4°C in between. Neutrophils were then centrifuged again at 500xg for 5 min at 4°C, washed  
498 once with 30 mL ice-cold PBS, centrifuged again at 500xg for 5 min at 4°C and resuspended  
499 in RT HEPES medium (20 mM HEPES, 132 mM NaCl, 6 mM KCL, 1 mM CaCl<sub>2</sub>, 1 mM MgSO<sub>4</sub>,  
500 1.2 mM K<sub>2</sub>HPO<sub>4</sub>, 5 mM glucose (All Sigma-Aldrich), and 0.4% (w/v) human serum albumin  
501 (Sanquin Reagents), pH7.4). Neutrophil counts were determined using a cell counter (Casey).  
502 Neutrophils were kept at a concentration of 2 million/mL at RT. Neutrophils were kept no longer  
503 than 4 hours after isolation.

#### 504 **Neutrophil transmigration under physiological flow**

505 30.000 HUVECs or 20.000 BOECs per lane were seeded in respectively FN- or collagen-  
506 coated Ibidi  $\mu$ -slides VI<sup>0.4</sup> (Ibidi, Munich, Germany) and grown for 48 hours. TNF- $\alpha$  treatment  
507 (10 ng/mL) was performed 20 hours before the experiment, when the endothelial cells were  
508 grown into a confluent monolayer. A total of 6 million neutrophils, at 2 million/mL, was  
509 membrane-labelled for 20 minutes at 37°C with Vybrant™ DiO or DiD Cell-labeling solution  
510 (1:6000). Stained neutrophils were centrifuged for 3 minutes at 300xg at RT to wash away  
511 residual labeling solution. Neutrophils were resuspended in HEPES medium to a  
512 concentration of 1 million/mL. After letting the neutrophil recover at RT for 20 minutes, 1 million  
513 neutrophils at a time were incubated at 37°C for 20 minutes before using them. The Ibidi flow  
514 chamber containing the endothelial cells was connected to a perfusion system and underwent  
515 shear flow of 0.5 mL/min (0.8 dyne/cm<sup>2</sup>) for 2 minutes before injecting 700.000 neutrophils  
516 into the tubing system.

517 Except for experiments with photoconvertible proteins, flow assays were imaged using  
518 an Axiovert 200 M widefield microscope, using a 10x NA 0.30 DIC Air objective (Zeiss).  
519 Fluorescent excitation light was provided by a HXP 120 C light source at 100% intensity and  
520 a TL Halogen Lamp at 6.06 V for transmitted light. Signal was detected with an AxioCam ICc  
521 3 (Zeiss) camera. For the DIC channel, an exposure of 32 ms was used. For DiO-stained  
522 neutrophils, a 450-490 excitation filter, a 495 beam splitter, and a 500-550 emission filter were  
523 used with an exposure of 1900 ms. For DiD-stained neutrophils, a 625-655 excitation filter, a  
524 660 beam splitter, and a 665-715 emission filter were used with an exposure of 1400 ms. To  
525 analyze neutrophil crawling dynamics and diapedesis locations Images were taken every 5  
526 seconds for 15 minutes in two positions in the middle of the ibidi flow chamber lane.  
527 Immediately after acquiring the time-lapse, a tile scan of 4x6 frames was collected to quantify  
528 total adhesion and transmigration numbers. Images were taken using Zeiss using Zen Blue  
529 software. The tile scan was stitched using Zen Black software, using the DIC channel for  
530 stitching.

531

#### 532 **Quantification neutrophil transmigration dynamics**

533 All analyses were performed in Imaris version 9.7.2. To quantify total adhesion and diapedesis  
534 efficacy, a spot analysis was performed on the tile scans to count cells adhering on top of the  
535 monolayer and cells crawling on the subendothelial side of the monolayer. Spot analysis was  
536 performed on the DiD or DiO channel, with an estimated dot size of 8 micron. Only spots with  
537 a quality higher than 80 were filtered to ensure only neutrophils were counted. To distinguish  
538 neutrophils above and underneath the endothelium, a filter based on intensity in the DIC  
539 channel was added in the pipeline. Since neutrophils are white and round when on top of the  
540 endothelium and black and spread out when underneath the endothelium (Figure 1A), this  
541 filter could be used to separately count adhering and transmigrated neutrophils. Total  
542 adhesion was calculated as # adhering neutrophils + # transmigrated neutrophils, and due to  
543 large donor-dependent variation was normalized to a control experiment and shown as a  
544 percentage. Neutrophil diapedesis efficacy was quantified as ( $\#$  adhering neutrophils/ ( $\#$  total  
545 detected neutrophils) \* 100%. The same spot analysis on neutrophils above the endothelial  
546 layer was performed on time-lapse data to quantify neutrophil crawling dynamics. A tracking  
547 step was added to the pipeline to connect the spots of each frame and detect neutrophil  
548 crawling patterns. For tracking analysis, the auto-regressive motion was used, with a  
549 maximum distance of 20 um between spots and allowing a gap size of 1 frame. Finally, tracks  
550 with less than 4 spots were filtered out to remove rolling neutrophils from the dataset. For  
551 optimal results, no more than 200 neutrophil tracks were allowed per video, and tracks were  
552 all manually checked for correctness. From this analysis, crawling speed, length,  
553 displacement, duration and linearity were calculated. Additionally, by taking the track starting  
554 location and track mean location, and subtracting those from each other, we were able to  
555 determine whether neutrophils crawled against or with the direction of flow. For this analysis,  
556 we discarded all tracks with less than 20 micron track lengths.

557

### 558 **Quantification of hotspot dynamics**

559 Analysis of neutrophil crawling tracks in Imaris software was performed in widefield time-lapse  
560 data to compare behaviour of neutrophils at hotspots with neutrophils not utilizing hotspots.  
561 Only tracks that ended with diapedesis were used in this analysis. Tracks were classified as  
562 'hotspot tracks' when they ended within 50 microns, the average diameter of a HUVEC cell,  
563 of another ending track. Neutrophils were classified as a 'non-hotspot track' if this criterium  
564 was not met. To assess the randomness of neutrophil diapedesis sites, track analysis was  
565 performed in Imaris on subendothelial neutrophils. All first spots of subendothelial crawling  
566 tracks were classified as 'diapedesis sites'. All diapedesis site locations were masked in a new  
567 frame and a time projection was performed to generate one frame with all diapedesis sites. A  
568 spot analysis in Imaris was done on this frame to count the number of diapedesis sites in the  
569 time-lapse and the mean distance to its one, three, five or nine nearest neighbouring

570 diapedesis sites was calculated. In FIJI (v1.52p)<sup>55</sup>, the same number of random spots was  
571 generated in an image with the same dimensions size as the time-cropped time-lapse frame.  
572 The same spot analysis and subsequent calculations were performed on this image. To create  
573 a parameter for randomness, the median distance to n nearest neighbours of diapedesis sites  
574 was divided by the median distance to n nearest neighbours of random sites. The more this  
575 value approaches 1, the more the diapedesis sites approach a purely random distributed  
576 pattern. The same analysis was done for measuring randomness of neutrophil adhesion sites,  
577 but instead of using the first spot of subendothelial tracks, the first spot of neutrophils crawling  
578 on top of the endothelium were used. Additionally, only tracks that ended in successful  
579 diapedesis were used in this analysis.

580

### 581 **Artificial hotspot neutrophil flow assay**

582 To generate artificial adhesion molecule heterogeneity, ICAM-1/2 double knockout BOECs  
583 were transduced with (truncated) variants of ICAM-1 and ICAM-2. No puromycin selection was  
584 performed to preserve the non-transduced cells. Neutrophil flow assays were performed as  
585 described above, using unstained neutrophils. The DIC channel was imaged the same as  
586 described above. GFP was imaged with the same settings as DiO. mKate was imaged using  
587 a 559-585 excitation filter, a 590 beam splitter and a 600-690 emission filter, with an exposure  
588 time of 1200 ms. To quantify whether neutrophils preferred to adhere to transduced cells,  
589 neutrophils landing spots were manually analyzed, tallying whether a neutrophil that later  
590 underwent successful diapedesis adhered to a transduced or non-transduced cell. To take  
591 into account the variation in transduction efficacy between fields of view, the counted adhesion  
592 events were normalized against the percentage of the area in the field of view that was covered  
593 by transduced cells.

594

### 595 **Fixed immunofluorescent stains**

596 For regular 2D cultered samples, HUVECs or BOECs were cultured in respectively FN- and  
597 collagen-coated Ibidi  $\mu$ -slides VI<sup>0.4</sup> (Ibidi, Munich, Germany). For fixation, 100  $\mu$ L 4%  
598 Paraformaldehyde (PFA) in PBS++ was added to a drained flow chamber. Since all antibodies  
599 bound to extracellular epitopes, no permeabilization step was performed. Samples were  
600 blocked with 2% Bovine Serum Albumin (BSA) in PBS++. Primary antibodies were incubated  
601 for 1 hour at RT in PBS++, after which, if not working with directly conjugated antibodies,  
602 secondary antibodies were also incubated for 1 hour at RT. Between all fixation, blocking and  
603 staining steps, the flow chamber was washed three times with PBS++. If two primary  
604 antibodies were both raised in the same species, a three-step staining was performed: starting  
605 with an unconjugated primary antibody, followed by an accompanying secondary antibody,

606 followed by second, directly conjugated antibody.

607 A Zeiss LSM 980 with Airyscan 2 module was used for detailed high-resolution  
608 confocal imaging of fixed samples, using a Plan-Apochromat 40x NA 1.3 oil DIC objective  
609 (Zeiss, 420762-9800-000) and a voxel size of 0.053 x 0.053 x 0.220  $\mu\text{m}$  to capture Z-stacks.  
610 For all images, Multiplex SR-8Y settings were used and a GaAsP-PMT detector was used as  
611 a detector. GFP was excited using a 488 nm laser with a laser power of 0.2%, mKate was  
612 imaged using a 561 nm laser with 2.4% laser power, and Alexa Fluor 647 was excited with a  
613 639 nm laser using 0.6% laser power. Images were acquired and 3D Airyscan-processed in  
614 Zen Blue version 3.3. Maximum projections were constructed in FIJI.

615 Vessel-on-a-chip samples were cultured and imaged as described here<sup>40</sup>. Patient  
616 tissue samples were received from the department of Pathology of the Amsterdam UMC,  
617 location AMC. All tissue samples were obtained with informed consent and according to Dutch  
618 guidelines for secondary used biological materials. Patient tissue samples were received from  
619 the department of Pathology of the Amsterdam UMC, location AMC. All samples were  
620 obtained and handled according current Dutch legislation regarding responsible secondary  
621 use of human tissues. Chronically inflamed patient samples, originating from the colonic  
622 mesentery, were obtained from inflammatory bowel disease patients, were obtained from  
623 inflammatory bowel disease patients during partial colectomy. Healthy mesenteric tissue was  
624 obtained from residual tissue of patients with intestinal carcinoma undergoing resection  
625 surgery. All tissue was stored in PBS++ at 4 degrees and prepared for imaging within 24 hours.  
626 Samples were prepared by cutting off small pieces of around 0.5 cm in diameter. If required,  
627 samples were incubated for 4 hours in PBS++ containing 10 ng/mL TNF- $\alpha$  for 4 hours at 37  
628  $^{\circ}\text{C}$ . These pieces were fixed with 4% PFA for 15 min at 37  $^{\circ}\text{C}$ , permeabilized for 10 min with  
629 0.5% triton-X at RT and finally blocked with 2% BSA for 30 min at RT. Between all steps, the  
630 sample was washed with PBS++. Stains were performed with a 1-hour incubation step by  
631 putting the sample in an antibody solution in a 1.5 mL Eppendorf in a slow rotator at 37  $^{\circ}\text{C}$ .  
632 Finally, tissue samples were mounted on glass bottom microwell dishes (MatTek, P35G-1.5-  
633 14-C) using 10% Mowiol.

634 Samples were imaged with the Zeiss LSM 980 with Airyscan module, using the same  
635 set-up as described above and having a voxel size of 0.038 x 0.038 x 0.170  $\mu\text{m}$ . Hoechst was  
636 measured using a 405 nm laser with 2.4% laser power, ATTO-488 was measured with a 488  
637 nm laser with 0.5% laser power, Alexa Fluor 568 was excited with a 561 nm laser with 4.5%  
638 laser power, and Alexa Fluor 647 was excited using a 639 nm laser with 8.5% laser power. All  
639 images were 3D Airyscan-processed.

640

641 **Confocal imaging of adhesion molecule heterogeneity**

642 To image heterogeneity of adhesion molecules, fixed Ibidi flow chambers were stained for  
643 nuclei and ICAM-1, ICAM-2 or VCAM-1. Z-stack imaging was performed with the Zeiss LSM  
644 980, using its confocal mode, using a Plan-Apochromat 20x objective NA 0.8 (Zeiss, 420650-  
645 9903-000). Voxel size was 1.184 x 1.184 x 0.5  $\mu\text{m}$ . Hoechst was imaged with a 405 nm laser  
646 at 5.50% laser power and Alexa Fluor was excited with a 639 nm laser with 8% laser power.  
647 To measure heterogeneity, FIJI was used to generate sum projections of the Z-stacks. A  
648 rolling ball background subtraction of 25 pixels was performed on the nuclei channel, after  
649 which the nuclei were segmented by a threshold and a particle analysis on particles between  
650 50-1000 pixels was performed. Then, fluorescent intensity was measured in the ICAM-  
651 1/ICAM-2/VCAM-1 channel. Data was normalized within every field of view to correct for  
652 inherent differences between fields of view. Coefficient of variation (SD/mean) of fluorescent  
653 intensity was used as a measurement of heterogeneity in the dataset.

654

### 655 **mEos4b photoconverting assay**

656 For photoconversion assays, HUVECs were transduced and puromycin-selected with  
657 mEos4b. Neutrophil flow assays with unstained neutrophils were performed as described  
658 above. Imaging was performed on the Zeiss LSM 980, using its confocal mode as described  
659 above. First, neutrophil TEM was live-imaged for 15 minutes at three positions, imaging only  
660 the transmitted light channel. Afterwards, the same three positions were imaged fluorescently  
661 in channels designed to capture both the green and red emitting variant of mEos4b. For the  
662 green channel, a 488 nm laser with 4% laser power was used. For the red channel, a 561 nm  
663 laser with 5% laser power was used. Frames were captured every 8 seconds, and after the  
664 fourth frame the interactive bleaching module was utilized to photoconvert mEos4b in the  
665 whole field of view towards its red emitting variant. For photoconverting, the 405 nm laser was  
666 used at 50% for 5 seconds. After photoconversion, the Ibidi flow chambers were immediately  
667 fixed and stained as described above for nuclei and an adhesion molecule. To find back  
668 exactly the same fields of view that were live-imaged, we scanned the Ibidi flow chamber for  
669 photoconverted mEos4b and took images to measure heterogeneity of adhesion molecules.  
670 To correlate adhesion events to level of adhesion molecule expression, all ECs were  
671 numbered, after which the number of adhesion events followed by either diapedesis or  
672 detachment on each EC was tallied. Finally, all ECs on which adhesion events have taken  
673 place were ranked from 0% (lowest expression) to 100% (highest expression).

674

### 675 **Texas Red-Dextran permeability and transmigration assay**

676 Endothelial cells (50.000 HUVEC or 35.000 BOEC) were seeded in FN-coated 24-well cell  
677 culture inserts (Corning FluoroBlok, Falcon, 3.0- $\mu\text{m}$  pore size 351151) in a 24-well plate



678 (Corning Companion Plate, Falcon, 353504) and cultured for 48 hours. Endothelial cells were  
679 treated with 10 ng/mL TNF- $\alpha$  20 hours before the experiment. 100.000 DiO labeled neutrophils  
680 (1:6.000) and 100  $\mu$ g Texas Red-Dextran (70 kDa; Sigma) in HEPES medium (20 mM HEPES,  
681 132 mM NaCl, 6 mM KCL, 1 mM CaCl<sub>2</sub>, 1 mM MgSO<sub>4</sub>, 1.2 mM K<sub>2</sub>HPO<sub>4</sub>, 5 mM glucose (All  
682 Sigma-Aldrich), and 0.4% (w/v) human serum albumin (Sanquin Reagents, Amsterdam, The  
683 Netherlands), pH7.4) were added to the upper compartment of the culture insert in a total  
684 volume of 120  $\mu$ L. 0.1 nM C5a (Sigma C-5788) in HEPES medium was added to the bottom  
685 compartment in a total volume of 600  $\mu$ L. Leakage and neutrophil TEM were measured  
686 simultaneously for 20 minutes with an interval of 1 minute using an Infinite F200 pro plate  
687 reader (TECAN) at 37°C. DiO labeled neutrophil TEM dynamics were measured using EX BP  
688 490/9 and EM BP 535/20. Leakage dynamics of Texas Red-Dextran were measured with EX  
689 BP 595/9 and EM BP 630/20. To measure basal leakage, just Texas Red-dextran was added  
690 to the upper compartment.

691

## 692 **Western blotting**

693 BOECs were grown in collagen-coated 6-well culture plates and washed twice with PBS++  
694 (PBS containing 0.5 MgCl<sub>2</sub> and 1 mM CaCl<sub>2</sub>). Lysis was performed with NP40 lysis buffer (50  
695 mM TrisHCl, 100 mM NaCl, 10 mM MgCl<sub>2</sub>, 1% NP40 and 10% glycerol, pH7.4) with 1:500  
696 protease inhibitor. Protein samples were centrifuged at 14.000 xG at RT for 10 minutes and  
697 resuspended in SDS-sample buffer containing 4%  $\beta$ -mecapto-ethanol. Samples were boiled  
698 at 95°C for 3 minutes to denature proteins and separated on a 4-12% NuPage Bis-Tris gel  
699 (Invitrogen, NP0322BOX). Proteins were transferred using an iBlot Gel Transfer device  
700 (Invitrogen) for 7 minutes to a nitrocellulose membrane (Invitrogen, IB301002). Membranes  
701 were subsequently blocked with a 5% milk solution in tris-buffered saline with Tween 20  
702 (TBST) at RT for 30 minutes. Primary antibodies were incubated overnight at 4 degrees in  
703 TBST and secondary IRDye 800 and IRDye 680 antibodies were incubated at RT for 1 hour.  
704 After each blocking and staining step, the membranes were washed with TBST 3x minutes.  
705 Western blots were developed using an Odyssey imaging system.

706

## 707 **FACS**

708 FACS analysis was done using BD LSR II. Cells were detached using Accutase cell  
709 detachment solution (Sigma-Aldrich, A6964) and resuspended as  $2 \cdot 10^6$ /ml in PBS containing  
710 0.5% BSA, 1 mM CaCl<sub>2</sub>, 0.5 mM MgCl<sub>2</sub>. Antibody staining was performed for 30 minutes at  
711 4°C. Cells were washed twice with PBS + BSA and directly analyzed. Single cells were gated  
712 using forward scatter and side scatter and further analyzed in FlowJo software (Tree Star,  
713 version 10).

714

## 715 **Cell sorting ICAM-1 high cells**

716 HUVECs were grown into confluent monolayers in a total of 3 t150 flasks. After two washing  
717 steps with PBS++, HUVECs were stained for ICAM-1. Antibody stains for ICAM-1 were  
718 performed before cell detachment to mimic the ICAM-1 heterogeneity observed in monolayers  
719 most optimally. ICAM-1 antibody was incubated with the monolater for 20 min in EGM-2 at 37  
720 °C. After two more washing steps with PBS++, 5 mL accutase was added to each t150 for 7  
721 min at RT to take cells into suspension. Next, 5 mL EGM-2 was added to the suspension and  
722 cells were spinned down at 200xg for 5 min. The cell pallets were resuspended in EGM-2 in  
723 polypropylene tubes. A FACS Aria™ II or III Cell Sorter (BD) was used to sort the ICAM-1 5%  
724 high cells into suspension. As a control, the whole living cell population was sorted. After  
725 sorting, cells were seeded into Ibidi flow chambers or on transwell inserts, and neutrophil flow  
726 experiments and dextran leakage assays were conducted as described above.

727

## 728 **Statistics**

729 Data are presented as either means or medians + SD, indicated for each graph. For neutrophil  
730 quantifications, comparisons between two groups were performed by a paired t-test and  
731 comparisons between multiple groups were performed by One-way paired ANOVAs, pairing  
732 data of a single donor. For other experiments, a student t-test or One-way ANOVA was  
733 performed, indicating which conditions were compared. For calculation correlations, Pearson  
734 r was calculated. A two-tailed P value of <0.05 was considered significant. For microscopy  
735 images, representative images are shown.

736

## 737 **Conflicts of Interest**

738 The authors declare no conflict of interest.

739

## 740 **Acknowledgements**

741 This work was supported ZonMW NWO Vici grant # 91819632 (JDvB & MLBG)

742



## 743 References

- 744 1. Vestweber, D. How leukocytes cross the vascular endothelium. *Nature Reviews*  
745 *Immunology* vol. 15 692–704 (2015).
- 746 2. Alon, R. & van Buul, J. D. Leukocyte Breaching of Endothelial Barriers: The Actin  
747 Link. *Trends in Immunology* vol. 38 606–615 (2017).
- 748 3. Springer, T. A. Traffic signals for lymphocyte recirculation and leukocyte emigration:  
749 The multistep paradigm. *Cell* vol. 76 301–314 (1994).
- 750 4. Muller, W. A. Transendothelial migration: unifying principles from the endothelial  
751 perspective. *Immunological Reviews* vol. 273 61–75 (2016).
- 752 5. Nourshargh, S. & Alon, R. Leukocyte Migration into Inflamed Tissues. *Immunity* vol.  
753 41 694–707 (2014).
- 754 6. Butcher, E. C. Leukocyte-endothelial cell recognition: Three (or more) steps to  
755 specificity and diversity. *Cell* vol. 67 1033–1036 (1991).
- 756 7. Vestweber, D., Wessel, F. & Nottebaum, AF. Similarities and differences in the  
757 regulation of leukocyte extravasation and vascular permeability. *Semin.*  
758 *Immunopathol.* **36**, 177–192 (2014).
- 759 8. R, M. *et al.* Release of cellular tension signals self-restorative ventral lamellipodia to  
760 heal barrier micro-wounds. *J. Cell Biol.* **201**, 449–465 (2013).
- 761 9. Braun, L. J. *et al.* Platelets docking to VWF prevent leaks during leukocyte  
762 extravasation by stimulating Tie-2. *Blood* **136**, 627–639 (2020).
- 763 10. Heemskerk, N. *et al.* F-actin-rich contractile endothelial pores prevent vascular  
764 leakage during leukocyte diapedesis through local RhoA signalling. *Nat. Commun.* **7**,  
765 10493 (2016).
- 766 11. Hyun, Y. M., Choe, Y. H., Park, S. A. & Kim, M. LFA-1 (CD11a/CD18) and Mac-1  
767 (CD11b/CD18) distinctly regulate neutrophil extravasation through hotspots I and II.  
768 *Exp. Mol. Med.* **51**, 1–13 (2019).
- 769 12. Grönloh, M. L. B., Arts, J. J. G. & van Buul, J. D. Neutrophil transendothelial migration  
770 hotspots – mechanisms and implications. *J. Cell Sci.* **134**, jcs255653 (2021).
- 771 13. Gschwandtner, M. *et al.* Glycosaminoglycans are important mediators of neutrophilic  
772 inflammation in vivo. *Cytokine* **91**, 65–73 (2017).
- 773 14. Martínez-Burgo, B. *et al.* A C-terminal CXCL8 peptide based on chemokine–  
774 glycosaminoglycan interactions reduces neutrophil adhesion and migration during  
775 inflammation. *Immunology* **157**, 173–184 (2019).
- 776 15. Stroka, K. M. & Aranda-Espinoza, H. Neutrophils display biphasic relationship  
777 between migration and substrate stiffness. *Cell Motil. Cytoskeleton* **66**, 328–341  
778 (2009).

- 779 16. Schimmel, L. *et al.* Stiffness-Induced Endothelial DLC-1 Expression Forces Leukocyte  
780 Spreading through Stabilization of the ICAM-1 Adhesome. *Cell Rep.* **24**, 3115–3124  
781 (2018).
- 782 17. Gorina, R., Lyck, R., Vestweber, D. & Engelhardt, B.  $\beta$  2 Integrin–Mediated Crawling  
783 on Endothelial ICAM-1 and ICAM-2 Is a Prerequisite for Transcellular Neutrophil  
784 Diapedesis across the Inflamed Blood–Brain Barrier . *J. Immunol.* **192**, 324–337  
785 (2014).
- 786 18. Arts, J. J. G. *et al.* Endothelial junctional membrane protrusions serve as hotspots for  
787 neutrophil transmigration. *Elife* **10**, (2021).
- 788 19. Reglero-Real, N. *et al.* Autophagy modulates endothelial junctions to restrain  
789 neutrophil diapedesis during inflammation. *Immunity* (2021)  
790 doi:10.1016/j.immuni.2021.07.012.
- 791 20. Proebstl, D. *et al.* Pericytes support neutrophil subendothelial cell crawling and  
792 breaching of venular walls in vivo. *J. Exp. Med.* **209**, 1219–1234 (2012).
- 793 21. Song, J. *et al.* Endothelial Basement Membrane Laminin 511 Contributes to  
794 Endothelial Junctional Tightness and Thereby Inhibits Leukocyte Transmigration. *Cell*  
795 *Rep.* **18**, 1256–1269 (2017).
- 796 22. Wertheimer, S. J., Myers, C. L., Wallace, R. W. & Parks, T. P. Intercellular adhesion  
797 molecule-1 gene expression in human endothelial cells. Differential regulation by  
798 tumor necrosis factor-alpha and phorbol myristate acetate. **267**, 12030–12035 (1992).
- 799 23. Ramos, T. N., Bullard, D. C. & Barnum, S. R. ICAM-1: Isoforms and Phenotypes. *J.*  
800 *Immunol.* **192**, 4469–4474 (2014).
- 801 24. X, C. *et al.* Structural plasticity in Ig superfamily domain 4 of ICAM-1 mediates cell  
802 surface dimerization. *Proc. Natl. Acad. Sci. U. S. A.* **104**, 15358–15363 (2007).
- 803 25. Xu, H., Tong, I. L., De Fougères, A. R. & Springer, T. A. Isolation, characterization,  
804 and expression of mouse ICAM-2 complementary and genomic DNA. *J. Immunol.*  
805 **149**, (1992).
- 806 26. Halai, K., Whiteford, J., Ma, B., Nourshargh, S. & Woodfin, A. ICAM-2 facilitates  
807 luminal interactions between neutrophils and endothelial cells in vivo. *J. Cell Sci.* **127**,  
808 620–629 (2014).
- 809 27. Heit, B., Colarusso, P. & Kubes, P. Fundamentally different roles for LFA-1, Mac-1  
810 and  $\alpha$  4-integrin in neutrophil chemotaxis. *J. Cell Sci.* **118**, 5205–5220 (2005).
- 811 28. Li, R. *et al.* A peptide from ICAM-2 binds to the leukocyte integrin CD11a/CD18 and  
812 inhibits endothelial cell adhesion. *J. Biol. Chem.* **268**, 17513–17518 (1993).
- 813 29. Staunton, D. E., Dustin, M. L., Erickson, H. P. & Springer, T. A. The arrangement of  
814 the immunoglobulin-like domains of ICAM-1 and the binding sites for LFA-1 and  
815 rhinovirus. *Cell* **61**, 243–254 (1990).

- 816 30. Xie, J. *et al.* Intercellular adhesion molecule-2 (CD102) binds to the leukocyte integrin  
817 CD11b/CD18 through the A domain. *J. Immunol.* **155**, 3619–3628 (1995).
- 818 31. Schaefer, A. *et al.* Actin-binding proteins differentially regulate endothelial cell  
819 stiffness, ICAM-1 function and neutrophil transmigration. *J. Cell Sci.* **127**, 4470–4482  
820 (2014).
- 821 32. Kanters, E. *et al.* Filamin B mediates ICAM-1-driven leukocyte transendothelial  
822 migration. *J. Biol. Chem.* **283**, 31830–31839 (2008).
- 823 33. Castro Dias, M. *et al.* Brain endothelial tricellular junctions as novel sites for T cell  
824 diapedesis across the blood–brain barrier. *J. Cell Sci.* **134**, (2021).
- 825 34. Walpola, P. L., Gotlieb, A. I., Cybulsky, M. I. & Langille, B. L. Expression of ICAM-1  
826 and VCAM-1 and monocyte adherence in arteries exposed to altered shear stress.  
827 *Arterioscler. Thromb. Vasc. Biol.* **15**, 2–10 (1995).
- 828 35. Sumagin, R. & Sarelius, I. H. TNF- $\alpha$  activation of arterioles and venules alters  
829 distribution and levels of ICAM-1 and affects leukocyte-endothelial cell interactions.  
830 *Am. J. Physiol. Circ. Physiol.* **291**, H2116–H2125 (2006).
- 831 36. de Fougères, A. R., Stacker, S. A., Schwarting, R. & Springer, T. A.  
832 Characterization of ICAM-2 and evidence for a third counter-receptor for LFA1. *J.*  
833 *Exp. Med.* **174**, 253–267 (1991).
- 834 37. Gautam, N., Hedqvist, P. & Lindbom, L. Kinetics of leukocyte-induced changes in  
835 endothelial barrier function. *Br. J. Pharmacol.* **125**, 1109–1114 (1998).
- 836 38. Kroon, J. *et al.* Inflammation-Sensitive Myosin-X Functionally Supports Leukocyte  
837 Extravasation by Cdc42-Mediated ICAM-1-Rich Endothelial Filopodia Formation. *J.*  
838 *Immunol.* **200**, 1790–1801 (2018).
- 839 39. Oh, H. M. *et al.* RKIKK motif in the intracellular domain is critical for spatial and  
840 dynamic organization of ICAM-1: Functional implication for the leukocyte adhesion  
841 and transmigration. *Mol. Biol. Cell* **18**, 2322–2335 (2007).
- 842 40. Steen, A. C. I. van *et al.* Transendothelial migration induces differential migration  
843 dynamics of leukocytes in tissue matrix. *bioRxiv* 2021.09.02.458715 (2021)  
844 doi:10.1101/2021.09.02.458715.
- 845 41. Martin-Ramirez, J., Hofman, M., Van Den Biggelaar, M., Hebbel, R. P. & Voorberg, J.  
846 Establishment of outgrowth endothelial cells from peripheral blood. *Nat. Protoc.* **7**,  
847 1709–1715 (2012).
- 848 42. Avellino, A. M. *et al.* Blocking of up-regulated ICAM-1 does not prevent macrophage  
849 infiltration during Wallerian degeneration of peripheral nerve. *Exp. Neurol.* **187**, 430–  
850 444 (2004).
- 851 43. Issekutz, A. C., Rowter, D. & Springer, T. A. Role of ICAM-1 and ICAM-2 and  
852 alternate CD11/CD18 ligands in neutrophil transendothelial migration. *J. Leukoc. Biol.*

- 853           **65**, 117–126 (1999).
- 854   44.   Shang, X.-Z. & Issekutz, A. C. Contribution of CD11a/CD18, CD11b/CD18, ICAM-1  
855           (CD54) and-2 (CD102) to human monocyte migration through endothelium and  
856           connective tissue fibroblast barriers. doi:10.1002/(SICI)1521-4141(199806)28:06.  
857   45.   Lyck, R. *et al.* T-cell interaction with ICAM-1/ICAM-2 double-deficient brain  
858           endothelium in vitro: the cytoplasmic tail of endothelial ICAM-1 is necessary for  
859           transendothelial migration of T cells. *Blood* **102**, 3675–3683 (2003).
- 860   46.   Greenwood, J. *et al.* Intracellular domain of brain endothelial intercellular adhesion  
861           molecule-1 is essential for T lymphocyte-mediated signaling and migration. *J.*  
862           *Immunol.* **171**, 2099–2108 (2003).
- 863   47.   R, M. *et al.* Release of cellular tension signals self-restorative ventral lamellipodia to  
864           heal barrier micro-wounds. *J. Cell Biol.* **201**, 449–465 (2013).
- 865   48.   van Buul, J. D. Why vessels do not leak when leukocytes migrate out. *Blood* **136**,  
866           531–532 (2020).
- 867   49.   Lim, K. *et al.* Neutrophil trails guide influenzaspecific CD8+ T cells in the airways.  
868           *Science (80-. )*. **349**, aaa4352 (2015).
- 869   50.   Lyck, R. & Enzmann, G. The physiological roles of ICAM-1 and ICAM-2 in neutrophil  
870           migration into tissues. *Current Opinion in Hematology* vol. 22 53–59 (2015).
- 871   51.   Yuan, L. *et al.* A role of stochastic phenotype switching in generating mosaic  
872           endothelial cell heterogeneity. *Nat. Commun.* **7**, 10160 (2016).
- 873   52.   Turgeon, P. J. *et al.* Epigenetic Heterogeneity and Mitotic Heritability Prime  
874           Endothelial Cell Gene Induction. *J. Immunol.* **204**, 1173–1187 (2020).
- 875   53.   Paez-Segala, M. G. *et al.* Fixation-resistant photoactivatable fluorescent proteins for  
876           CLEM. *Nat. Methods* **12**, 215–218 (2015).
- 877   54.   Concordet, J. P. & Haeussler, M. CRISPOR: Intuitive guide selection for  
878           CRISPR/Cas9 genome editing experiments and screens. *Nucleic Acids Res.* **46**,  
879           W242–W245 (2018).
- 880   55.   Schindelin, J. *et al.* Fiji: an open-source platform for biological-image analysis. *Nat.*  
881           *Methods* **9**, 676–682 (2012).

882

883

884

## Figure 1

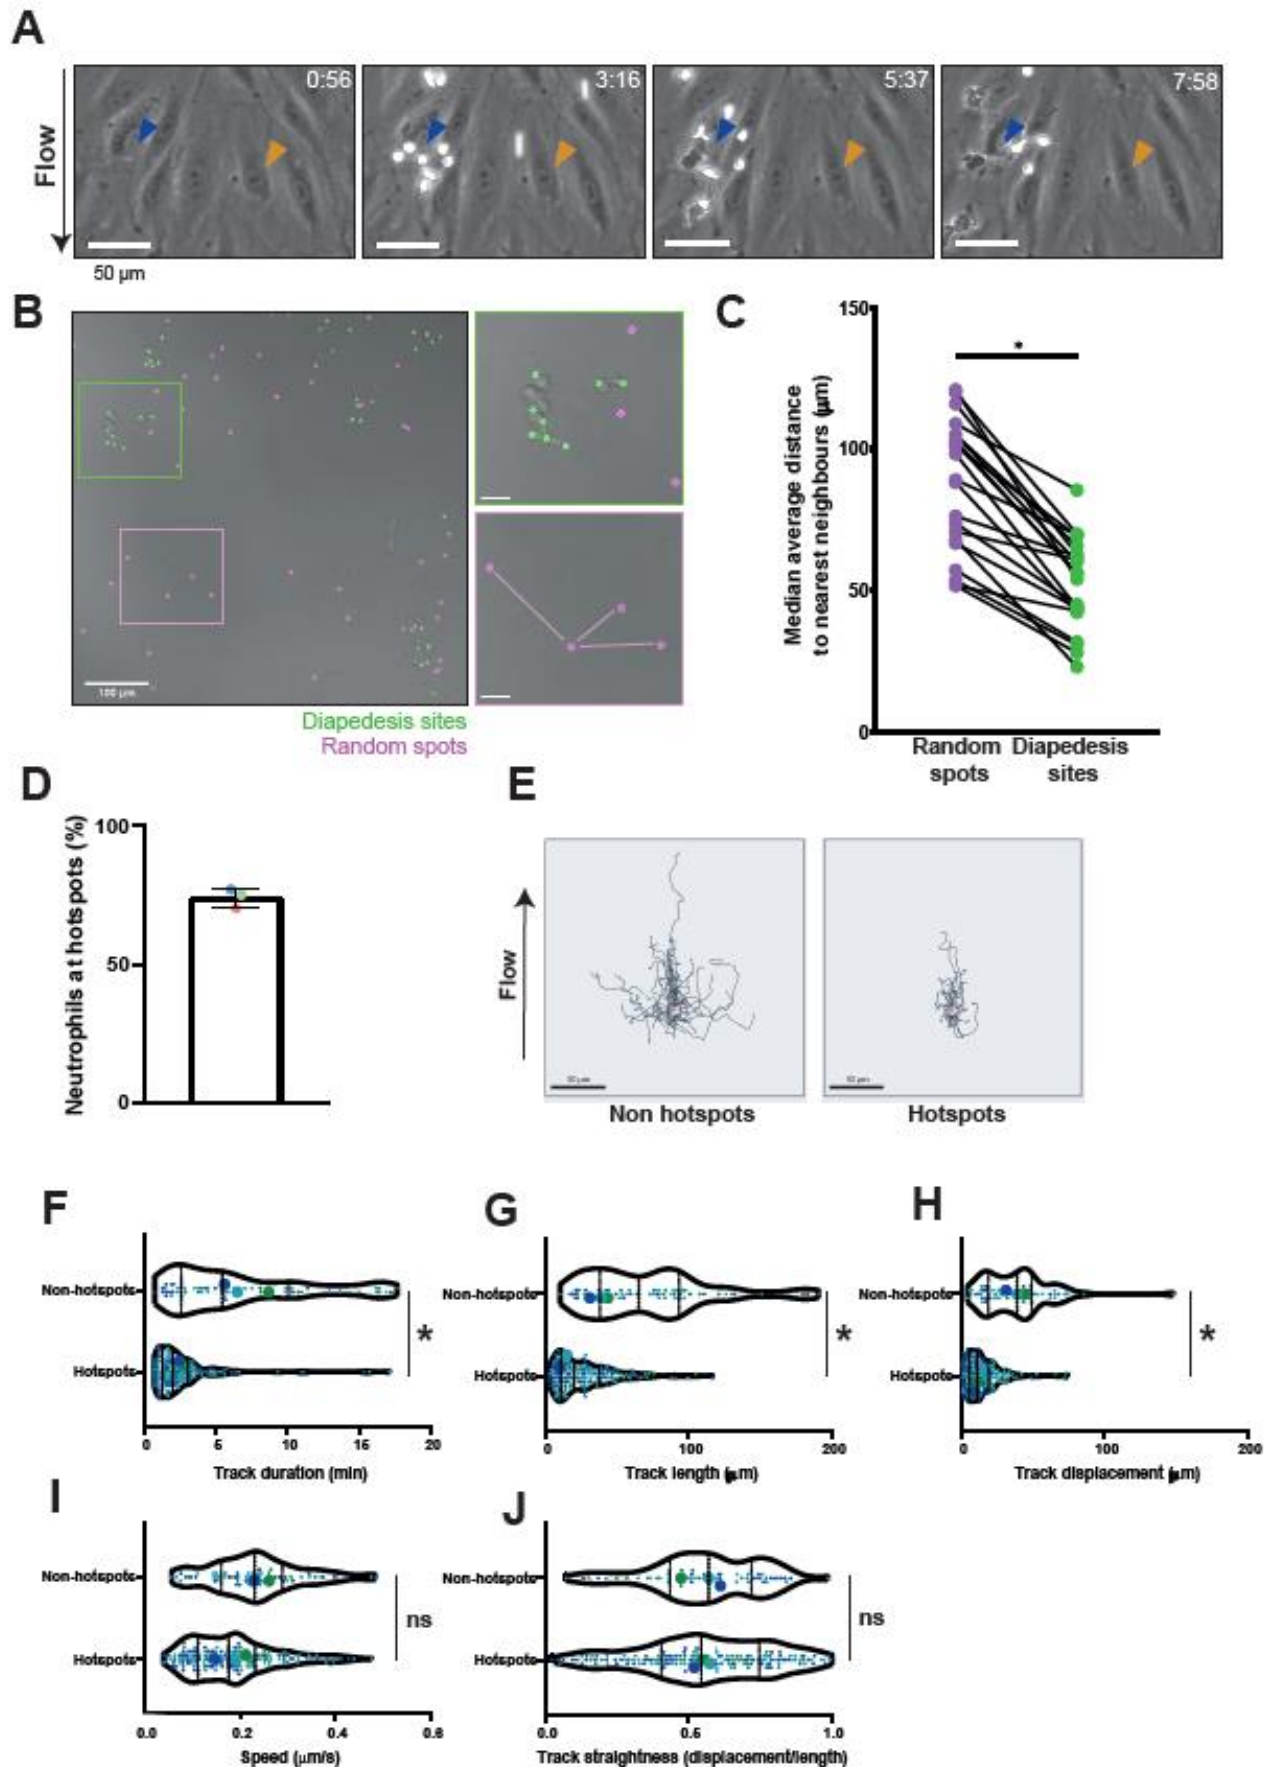



886 **Figure 1. Neutrophils transmigrate more efficient at TEM hotspots. (A)** Still from a time-lapse  
887 TEM assay, showing a neutrophil TEM hotspot indicated with a blue arrow and a largely by  
888 neutrophils ignored region indicated with an orange arrow. The direction of flow is from top to  
889 bottom, time is indicated in minutes at the top right. Scale bar, 50  $\mu\text{m}$ . **(B)** Brightfield still image  
890 from a neutrophil TEM experiment, with marked the diapedesis sites (green) and  
891 computationally generated random spots (magenta). Scale bar, 100  $\mu\text{m}$  **(C)** Medians of  
892 average distance to 3 nearest neighbours for each timelapse are plotted. Medians are paired  
893 with medians of average distance to 3 nearest neighbours of corresponding randomly  
894 generated spots. Paired t-test on the 21 medians:  $p < 0.0001$ . **(D)** Bar graph of total percentage  
895 of neutrophils utilizing hotspots ( $\geq 2$  diapedesis events). Means from 3 independent  
896 experiments are shown. Bar graph shows mean with SD. **(E)** 40 overlaid tracks of crawling  
897 neutrophils that eventually transmigrate at a TEM hotspot (right,  $\geq 2$  diapedesis events) or not  
898 (left, 1 diapedesis event). Scale bar, 50  $\mu\text{m}$ . **(F,G,H,I,J)**. Small dots represent individual  
899 datapoints, large dots are medians from each experiment. 174 hotspot tracks and 62 non-  
900 hotspot tracks from 3 independent experiments are represented in 3 different colours. Paired  
901 t-test on the medians of 3 independent experiments. **(F)** Violin plot of track duration of crawling  
902 neutrophils that eventually transmigrate at a TEM hotspot or not.  $p = 0.0121$ . **(G)** Violin plot of  
903 total track length of crawling neutrophils that eventually transmigrate at a hotspot or not.  $p =$   
904 0.039. **(H)** Violin plot of the total displacement (distance between the begin and the end of the  
905 track) of crawling neutrophils that eventually transmigrate at a TEM hotspot or not.  $p = 0.019$ .  
906 **(I)** Violin plot of average speed of crawling neutrophils that eventually transmigrate at a TEM  
907 hotspot or not.  $p = 0.051$ . **(J)** Violin plot of Track straightness (displacement from (F)/length  
908 from (E)) of crawling neutrophils that eventually transmigrate at a TEM hotspot or not.  $p =$   
909 0.95.  
910

## Figure S1

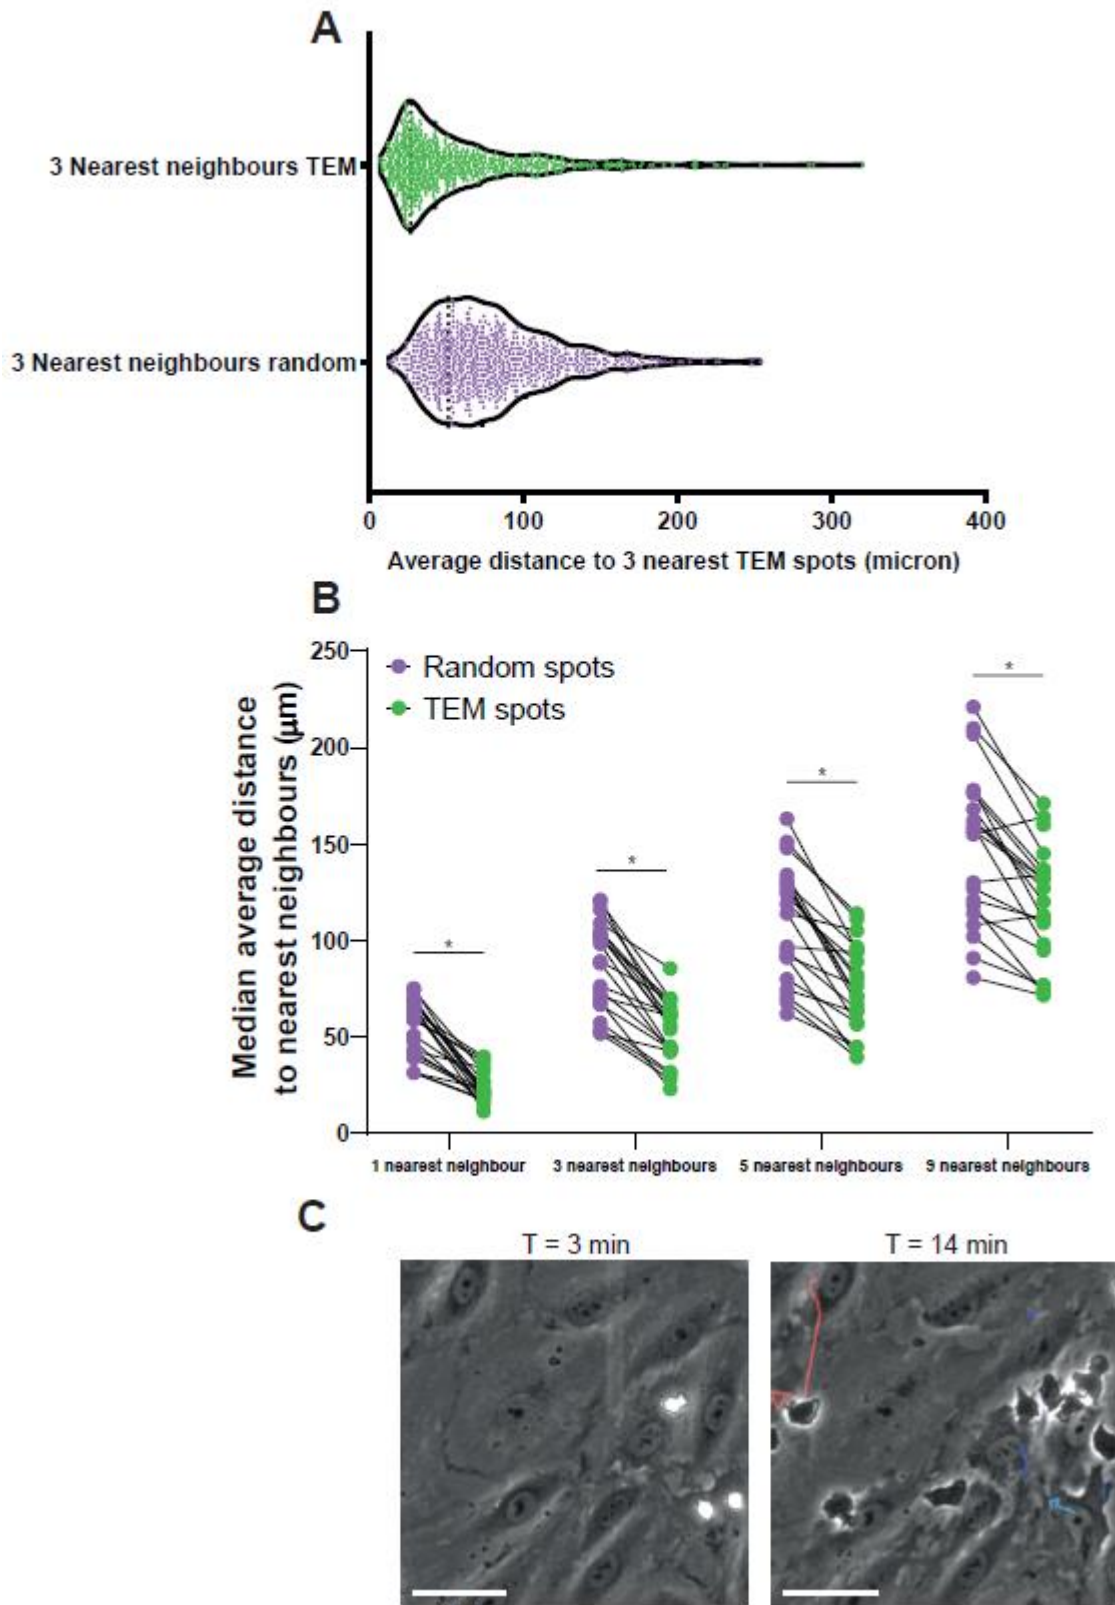

911  
912  
913  
914

**Figure S1.** Comparison of different nearest neighbour numbers and example hotspot and non-hotspot tracks. **(A)** Violin plot of average distance to 3 nearest neighbours for actual diapedesis sites and randomly generated spots. Each datapoint corresponds to



915 1 diapodesis site and 729 datapoints from 21 time-lapses are plotted from 3 independent  
916 experiments. **(B)** Comparison of analysis methods for nearest neighbour calculations. 1,  
917 3, 5 and 9 nearest neighbour(s) for each TEM spot were calculated and compared to  
918 randomly generated spots. Data is from 21 videos from 3 independent experiments.  
919 Paired t-test on the 21 medians for every comparison:  $p < 0.0001$  for all. **(C)** Stills from a  
920 DIC time-lapse TEM assay, showing neutrophils and their complete crawling tracks at  
921 hotspots, indicated with blue tracks, and non-hotspots, indicated with a red track. The  
922 direction of flow is from top to bottom, time is indicated in min:sec at the top right. Scale  
923 bar, 50  $\mu\text{m}$ .  
924

**Figure 2**

**A**

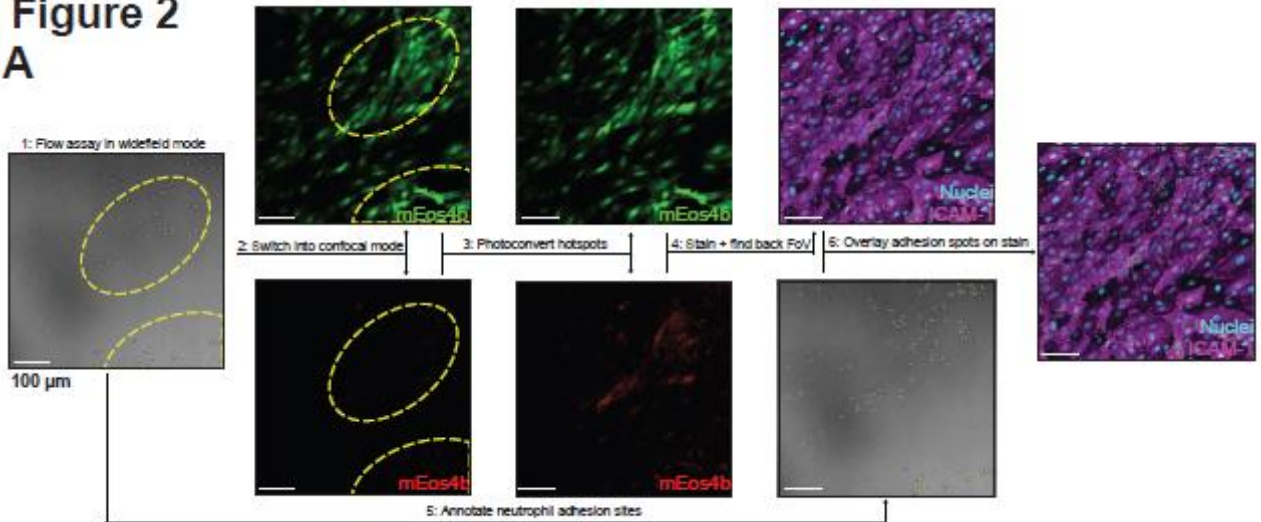

**B**

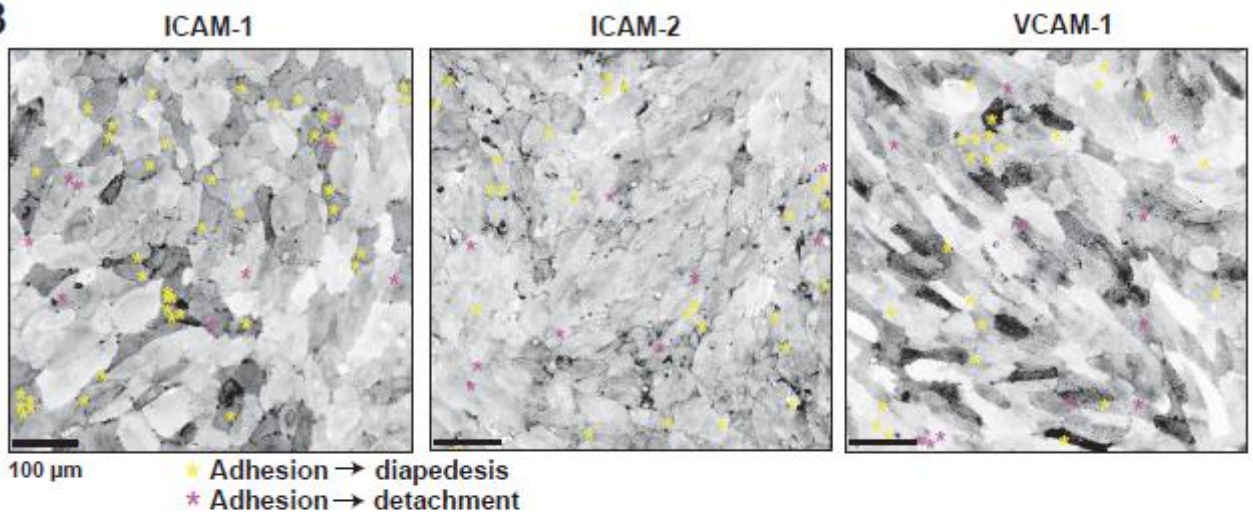

**C**

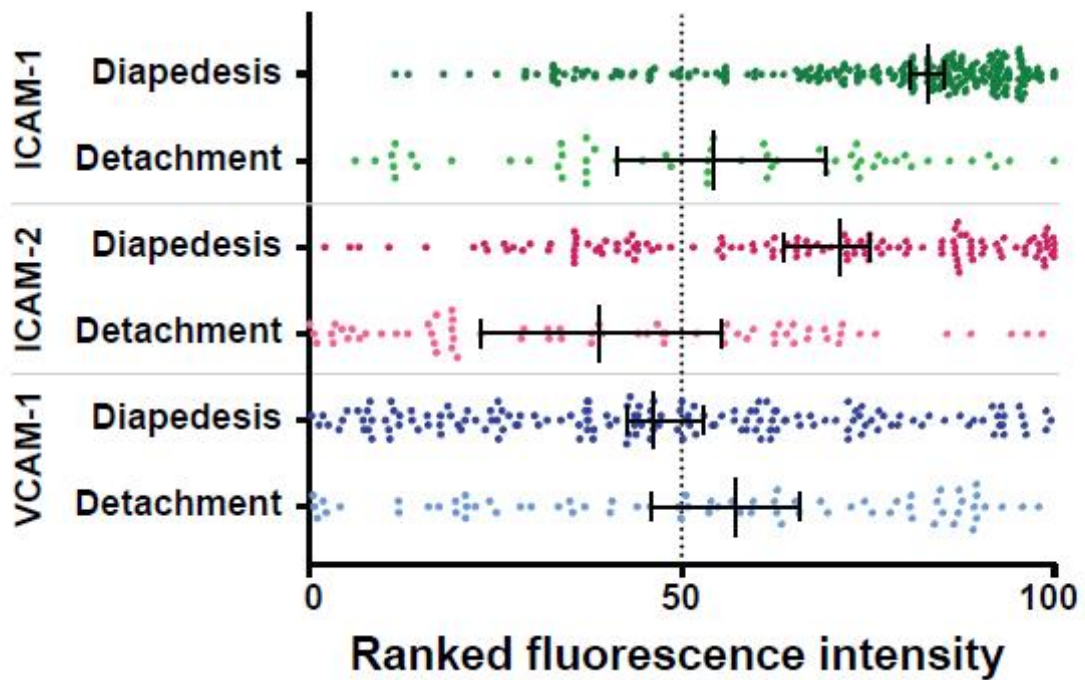

926 **Figure 2.** *Neutrophil transmigration hotspots are located at ICAM-1 high expressing*  
927 *cells. (A)* Simplified workflow for photoconversion experiments. (1) neutrophil flow  
928 assays were performed in widefield mode with HUVECs expressing mEos4b. (2) The  
929 same field of views were imaged in confocal mode. (3) Areas where hotspots had  
930 appeared in the widefield video were converted from green to red using a 405 nm laser.  
931 (4) The slides were fixed and the nuclei and an adhesion molecule were stained. The  
932 original fields of view were found backing by looking for red signal. (5) In the original  
933 video, all successful and unsuccessful adhesion events were annotated. (6) The  
934 adhesion spots were overlaid with the stained image. **(B)** Inverted greyscale LUT of  
935 immunofluorescence stains on HUVECs for ICAM-1, ICAM-2 and VCAM-1 of areas of  
936 which time-lapses were made, relocated by photoconversion of mEos4b. With yellow  
937 asterisks, adhesion events that led to diapedesis are shown. With magenta asterisks,  
938 adhesion events that were followed by detachment are shown. Scale bar = 100  $\mu\text{m}$ . **(C)**  
939 Quantification of adhesion events on HUVEC cells ranked by their preference for  
940 diapedesis for expression levels of ICAM-1 (green dots, n = 254 diapedesis adhesion  
941 events and n = 57 detachment adhesion events), ICAM-2 (magenta dots n = 129  
942 diapedesis adhesion events and n = 79 detachment adhesion events) and VCAM-1 (blue  
943 dots n = 163 diapedesis adhesion events and n = 72 detachment adhesion events). Data  
944 shown is from 9 (ICAM-1 and VCAM-1) or 6 (ICAM-2) images from 3 independent  
945 experiments. Median with 95% CI is shown.  
946



## Figure 3

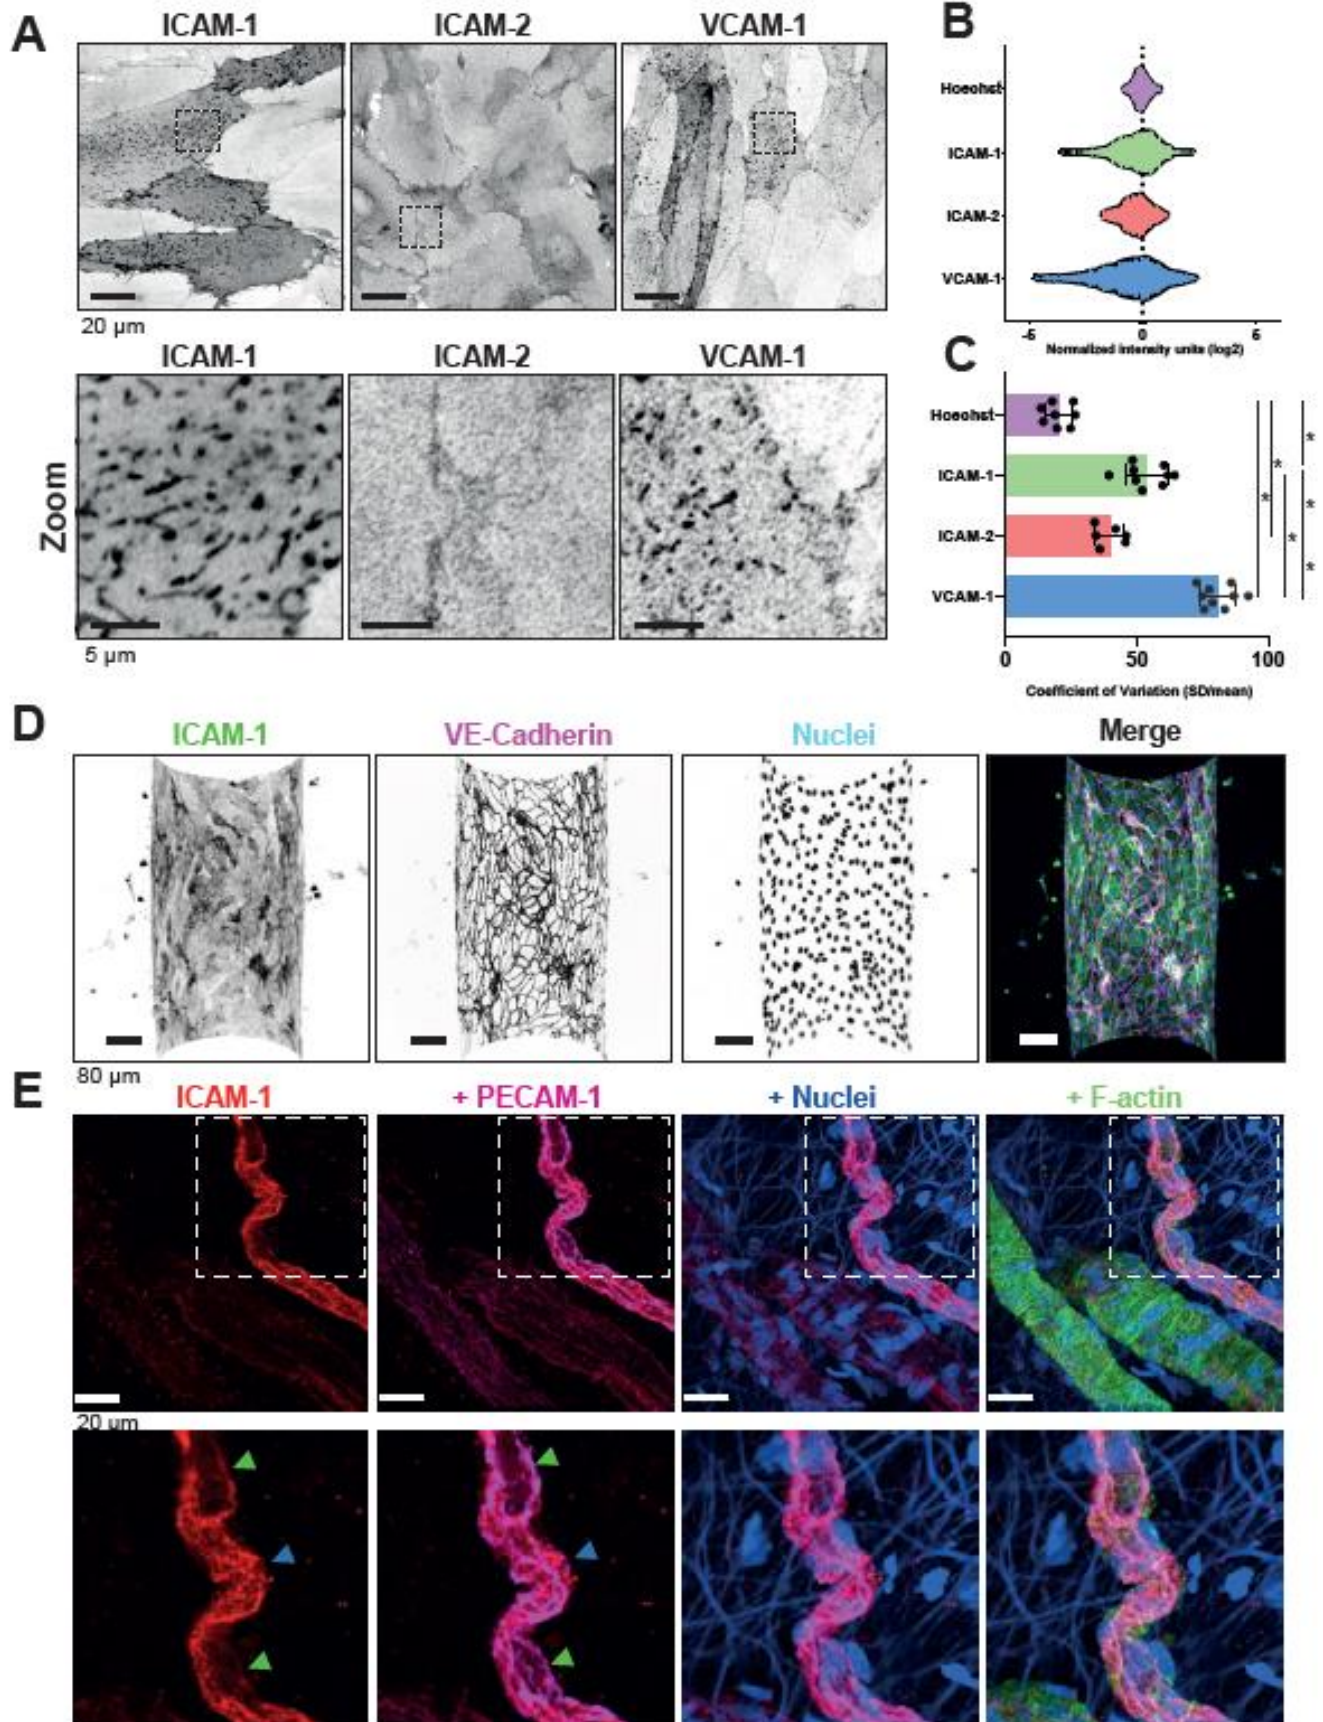

948 **Figure 3.** Adhesion molecules display varying degrees of heterogeneity across varying  
949 conditions **(A)** Inverted greyscale LUT of IF staining for ICAM-1, ICAM-2 and VCAM-1 on  
950 HUVECs after overnight TNF- $\alpha$  stimulation. ROIs represent zoom regions shown below. Scale  
951 bar, 20  $\mu\text{m}$  in upper panels, 5  $\mu\text{m}$  in bottom panels. **(B)** Violin plots showing Log<sub>2</sub>-normalized  
952 heterogeneous expression levels of Hoechst (N = 9 images, n = 1583 cells), ICAM-1 (N = 9  
953 images, n = 1778 cells), ICAM-2 (N = 6 images, n = 1097) and VCAM-1 N = 9 images (n =  
954 2306 cells). Each dot represents an individual cell and data is shown from 3 independent  
955 experiments. Data is normalized to mean intensity within an image to normalize for differences  
956 between each image. The dotted vertical line represents mean intensity **(C)** Bar graphs of the  
957 calculated coefficient of variation (CoV) (standard deviation/mean) for each field of view  
958 imaged in figure 2B. Data is shown from 3 independent experiments. Bar graphs show mean  
959 with SD. One-way ANOVA with multiple comparison correction was performed. ICAM-1 vs  
960 ICAM-2: p = 0.0018. All other combinations: p < 0.0001. **(D)** Inverted greyscale LUT of IF stain  
961 for ICAM-1, VE-cadherin and nuclei of a TNF- $\alpha$  treated vessel-on-a-chip composing of  
962 HUVECs. Scale bar, 80  $\mu\text{m}$ . For clarity, only the bottom half of the Z-stack is shown. **(E)** *Ex*  
963 *vivo* whole-mount stains of colonic mesenterial adipose tissue of a patient with active  
964 inflammatory bowel disease, with ICAM-1 low (green arrow) and ICAM-1 high (blue) cells  
965 indicated. ICAM-1 is shown in red, PECAM-1 in magenta, nuclei in blue and F-actin in green.  
966 Scale bar, 20  $\mu\text{m}$ .  
967

## Figure S2

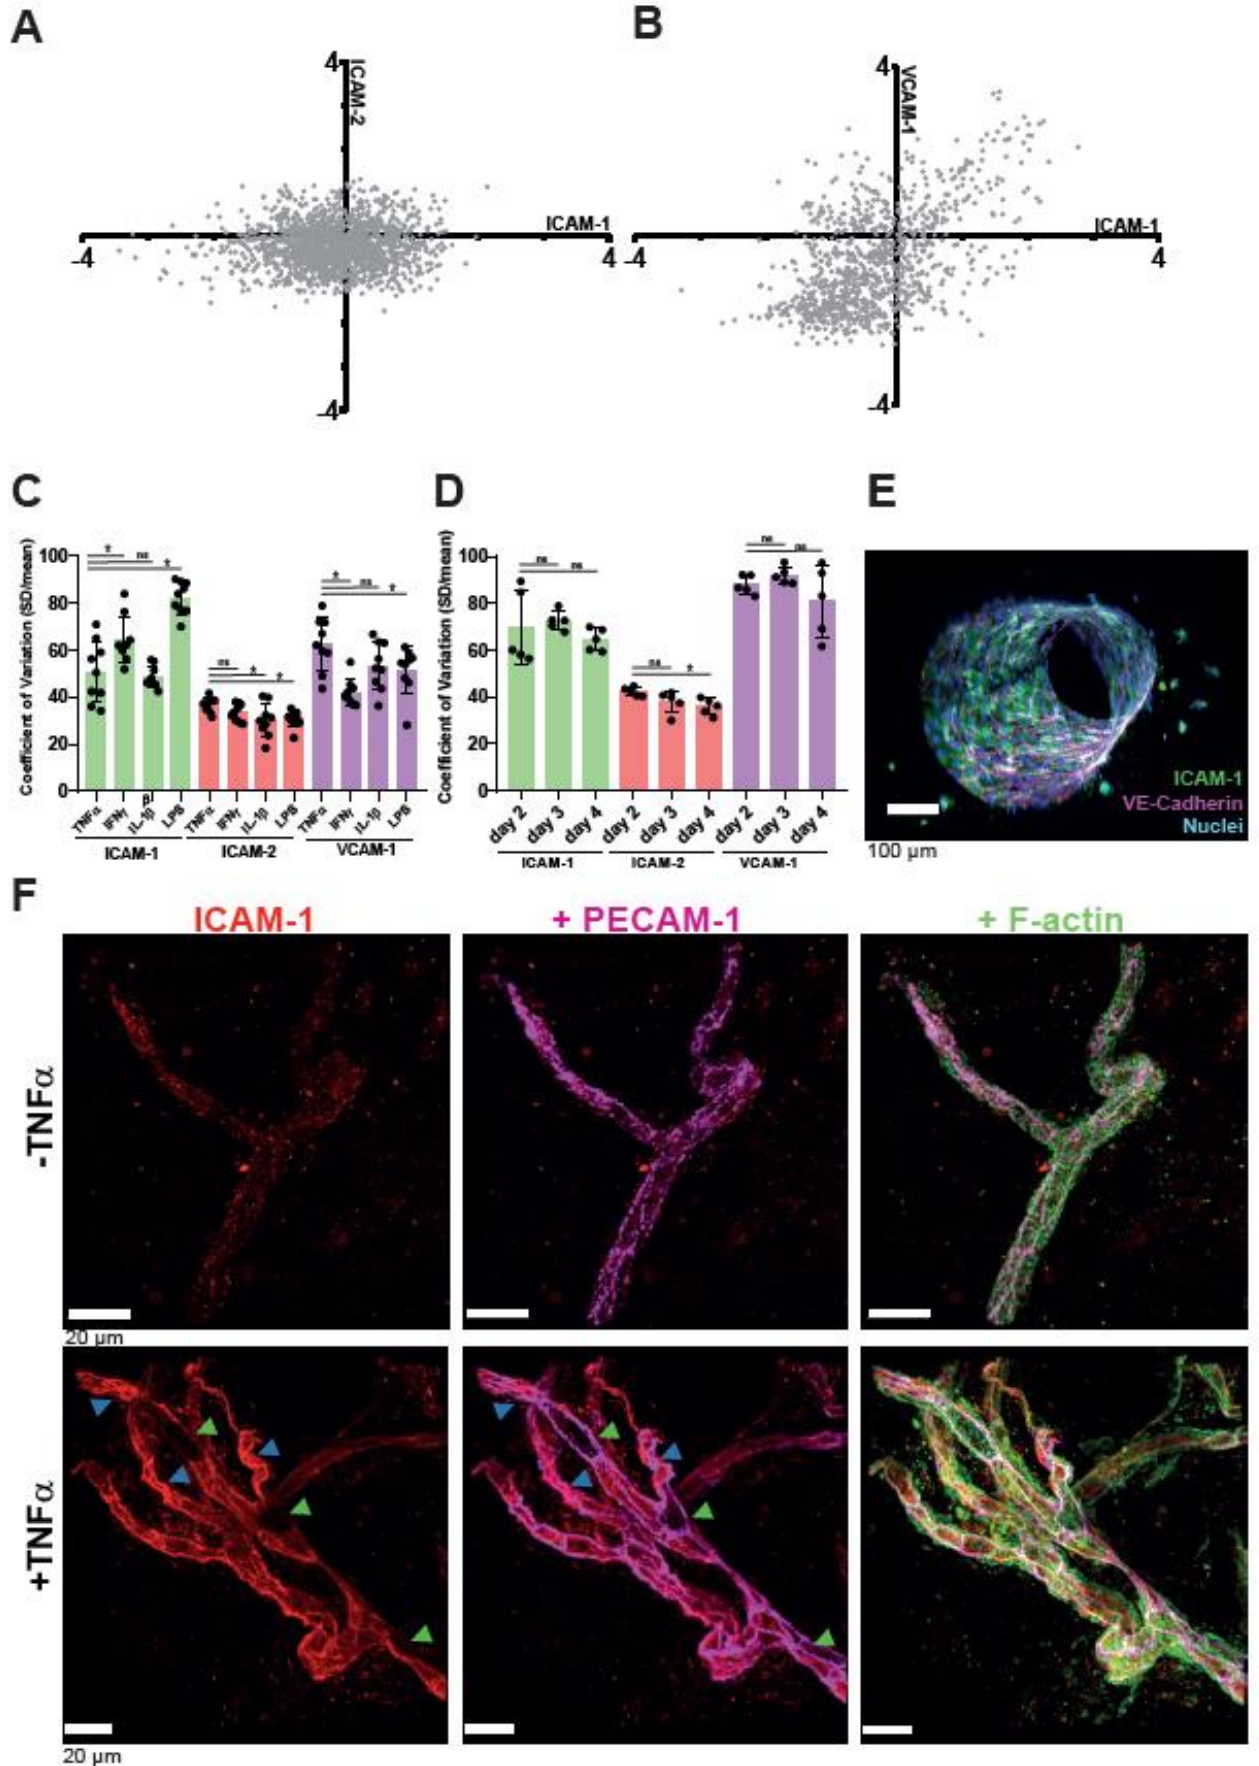



969 **Figure S2.** *Adhesion molecule heterogeneity persist across different variables and does not*  
970 *correlate strongly with each other.* **(A)** Correlation plot of Log2-transformed fluorescent  
971 intensity of ICAM-1 and ICAM-2, normalized within each field of view.  $r = 0.04481$ ,  $p = 0.072$   
972 **(B)** Correlation plot of Log2-transformed fluorescent intensity of ICAM-1 and VCAM-2,  
973 normalized within each field of view.  $r = 0.532$ ,  $p < 0.001$  **(C,D)** Bar graphs displaying  
974 Coefficient of Variations (CoV) of ICAM-1, ICAM-2 and VCAM-1 for each field of view  
975 measured. Data is shown from 3 independent experiments. Bars show mean with SD. **(C)**  
976 Different inflammatory stimulants. One-way ANOVA on means with multiple comparison  
977 correction against TNF- $\alpha$  data, separate test for each protein (N = 9 images per condition).  
978 ICAM-1 (TNF- $\alpha$  vs IFN- $\gamma$ :  $p = 0.0102$ . TNF- $\alpha$  vs IL-1 $\beta$ :  $p = 0.9171$ . TNF- $\alpha$  vs LPS:  $p < 0.0001$ ).  
979 ICAM-2 (TNF- $\alpha$  vs IFN- $\gamma$ :  $p = 0.2900$ . TNF- $\alpha$  vs IL-1 $\beta$ :  $p = 0.0107$ . TNF- $\alpha$  vs LPS:  $p = 0.0224$ ).  
980 VCAM-1 (TNF- $\alpha$  vs IFN- $\gamma$ :  $p = 0.0002$ . TNF- $\alpha$  vs IL-1 $\beta$ :  $p = 0.1192$ . TNF- $\alpha$  vs LPS:  $p = 0.0499$ ).  
981 **(D)** Different maturation states of the endothelial monolayer. One-way ANOVA on means with  
982 multiple comparison correction against day 2 data, separate test for each protein (N = 5  
983 images per condition). ICAM-1 (day 2 vs day 3:  $p = 0.8627$ . day 2 vs day 4:  $p = 0.6332$ .) ICAM-  
984 2 (day 2 vs day 3:  $p = 0.1338$ . day 2 vs day 4:  $p = 0.0262$ .) VCAM-1 (day 2 vs day 3:  $p =$   
985  $0.7364$ . day 2 vs day 4:  $p = 0.4043$ .) **(E)** Side view of whole vessel-on-a-chip, shown in figure  
986 2D. Stained for ICAM-1 (green), VE-cadherin (magenta) and nuclei (blue). Scale bar, 20  $\mu\text{m}$ .  
987 **(F)** *Ex vivo* whole-mount stains of healthy mesenterial adipose tissue of a carcinoma patient,  
988 incubated with without or with 10 ng/ $\mu\text{L}$  TNF- $\alpha$  for 4 hours. ICAM-1 low (green arrow) and  
989 ICAM-1 high (blue) cells indicated. ICAM-1 is shown in red, PECAM-1 in magenta and F-actin  
990 in green. Scale bar, 20  $\mu\text{m}$ .  
991

## Figure 4

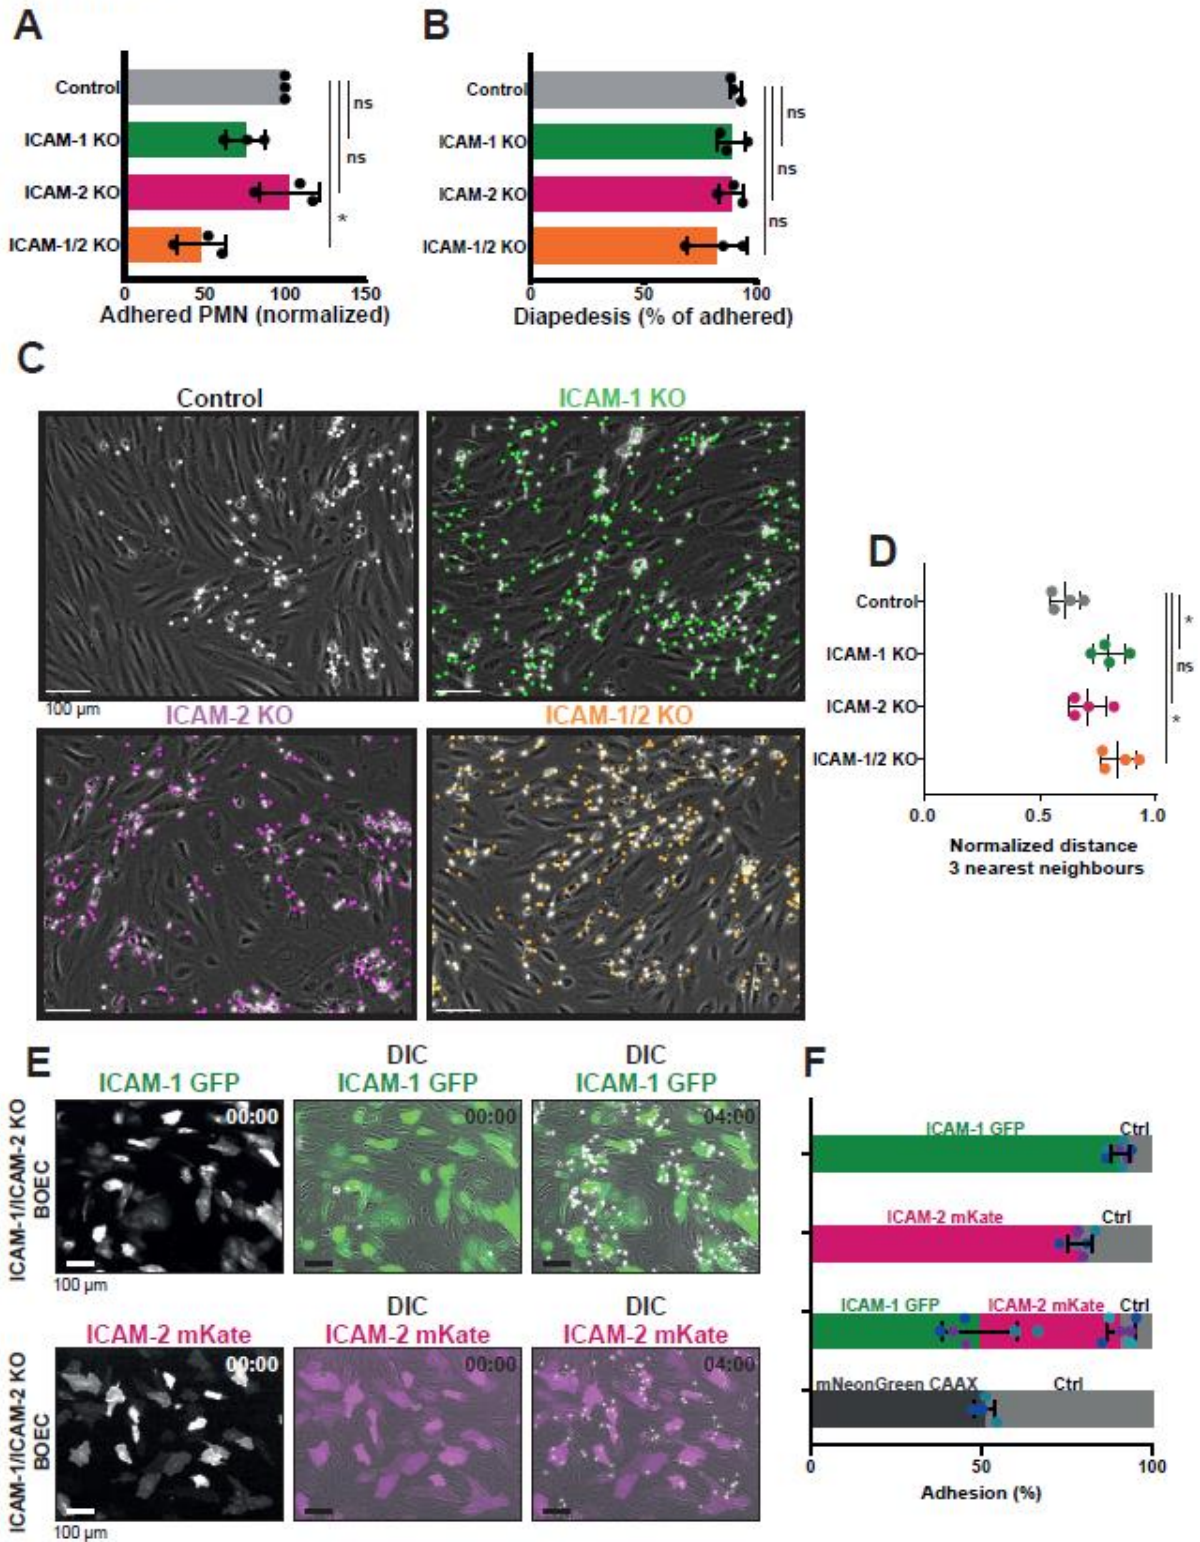

992

993 **Figure 4.** *ICAM-1 is the major marker for neutrophil hotspots.* **(A)** Quantification of number of  
994 adhered neutrophils (PMN) in TEM under flow assay using control BOECs (no gRNA), ICAM-  
995 1 KO BOECs, ICAM-2 KO BOECs, and double ICAM-1/2 KO BOECs. Data is normalized to  
996 control conditions (100%). Data consists of 3 independent experiments, 27141 total  
997 neutrophils measured. Bar graph displays mean with SD. One-way Paired ANOVA with  
998 multiple comparison correction, comparing all conditions with control. Control vs ICAM-1 KO:  
999  $p = 0.6139$ . Control vs ICAM-2 KO:  $p = 0.9725$ . Control vs ICAM-1/2 KO:  $p = 0.0296$ . **(B)**  
1000 Quantification of diapedesis efficacy (total transmigrated / total neutrophils detected \*100%)  
1001 of neutrophils through control, ICAM-1 KO, ICAM-2 KO, and ICAM-1/2 KO BOECs. Data  
1002 consists of 3 independent experiments, 27141 total neutrophils measured. Bar graph displays  
1003 mean with SD. One-way Paired ANOVA with multiple comparison correction, comparing all  
1004 conditions with control. Control vs ICAM-1 KO:  $p = 0.9679$  Control vs ICAM-2 KO:  $p = 0.9991$ .  
1005 Control vs ICAM-1/2 KO:  $p = 0.2281$ . **(C)** Stills from neutrophil flow timelapses over control,  
1006 ICAM-1 KO, ICAM-2 KO and ICAM-1/2 KO BOECs. All neutrophil TEM spots that occurred in  
1007 the timelapse are shown in grey (control), green (ICAM-1 KO), magenta (ICAM-2 KO) and  
1008 ICAM-1/2 KO (orange). Scale bar, 100  $\mu\text{m}$ . **(D)** Medians of average distance of adhesion sites  
1009 or TEM sites to 3 nearest neighbours, normalized against medians of the average distance to  
1010 three nearest neighbours of the corresponding randomly generated spots. Data from 4  
1011 independent experiments is shown. One-way Paired ANOVA with multiple comparison  
1012 correction, comparing all conditions with control. Control vs ICAM-1:  $p = 0.0150$ . Control vs  
1013 ICAM-2:  $p = 0.2077$ . Control vs ICAM-1/2 KO:  $p = 0.0049$ . **(E)** Time lapse imaging of TEM  
1014 under flow with ICAM-1/ICAM-2 KO cells. Part of EC monolayer is rescued with ICAM-1-GFP  
1015 (green) or ICAM-2-mKate (magenta). Time indicated in the upper right corner in minutes. Left  
1016 panels show ICAM-1 or ICAM-2 only channel, middle and right channel are merged with DIC.  
1017 White dots are adhering neutrophils, predominantly at rescue cells. Scale bar, 100  $\mu\text{m}$ . **(F)**  
1018 Quantification of the preference for neutrophils to adhere to ICAM-1-GFP (green), ICAM-2-  
1019 mKate (magenta) or CAAX-mNeonGreen (dark grey) expressed in ICAM-1/ICAM-2 KO ECs  
1020 or ICAM-1/ICAM-2 KO ECs (Ctrl) (light grey). Bars represent percentage of neutrophil that  
1021 adheres to indicated cell type. Numbers are corrected for area occupied. Dots are percentages  
1022 from individual time lapse images, colours represent data from 3 independent experiments.  
1023 Bars represent mean with standard deviation.

## Figure S3

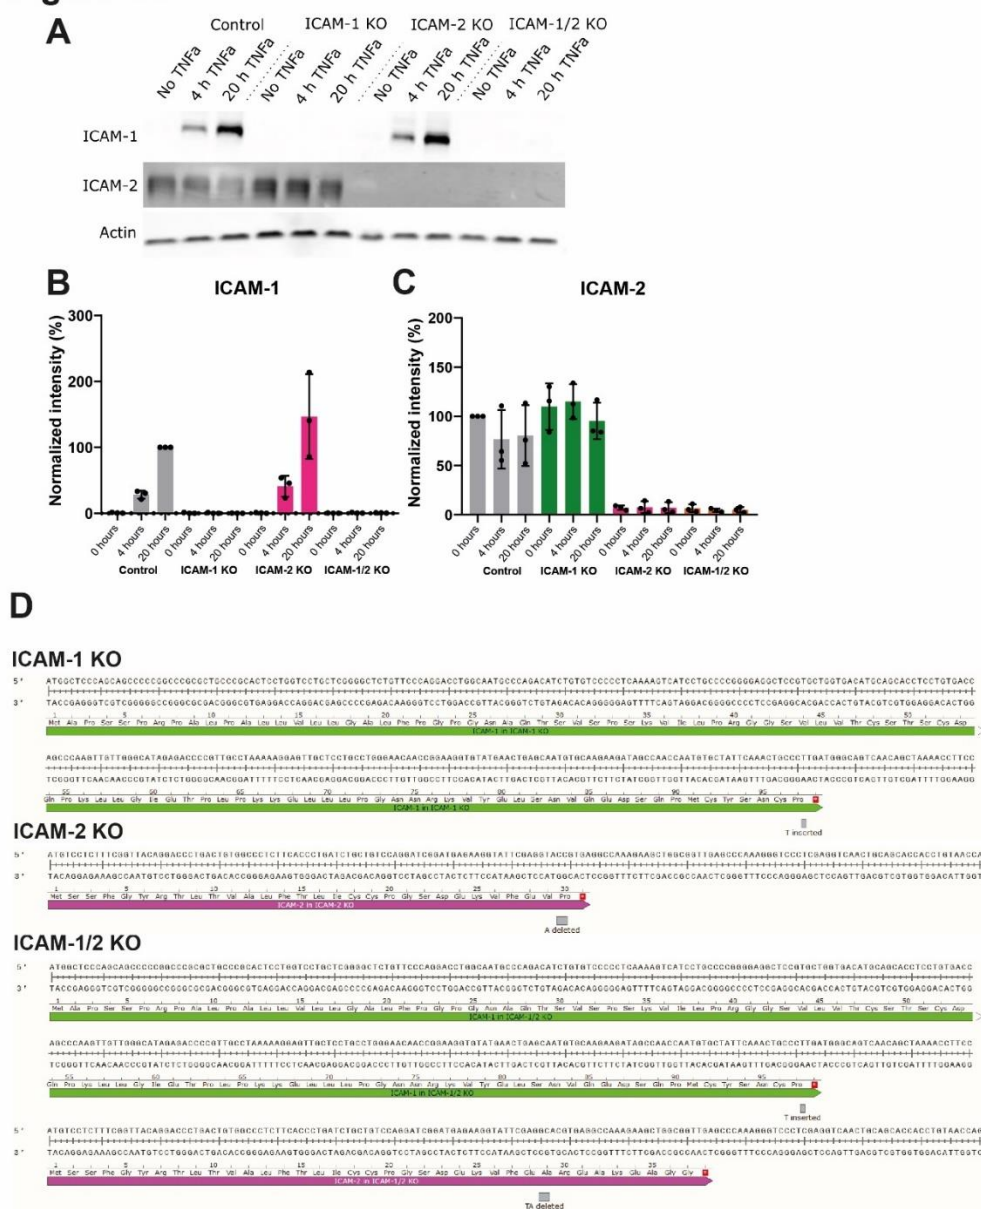

1024  
 1025 **Figure S3. Verification of ICAM-1/2 knockout BOECs. (A)** Western blot for ICAM-1 and ICAM-  
 1026 2 in Crispr knockouts after 0, 4 and 20 hours TNF- $\alpha$ . One representative gel out of three  
 1027 performed gels is shown. Actin is used as loading control. **(B,C)** Quantification of western blot  
 1028 for ICAM-1 **(B)** and ICAM-2 **(C)**, normalized to the actin loading control. Bar graphs display  
 1029 mean with SD. ICAM-1 data is normalized to 20 hours TNF- $\alpha$  in control BOECs, ICAM-2 data  
 1030 is normalized to 0 hours TNF- $\alpha$  in control BOECs. **(D)** Sequencing results of knockout cells.  
 1031 Mutations are depicted in grey block. Premature stop codon is depicted as star in red box. The  
 1032 protein sequences of the truncated ICAM-1 and ICAM-2 that are brought to expression in the  
 1033 KO BOECs are shown above the nucleotide sequence.

1034



## Figure S4

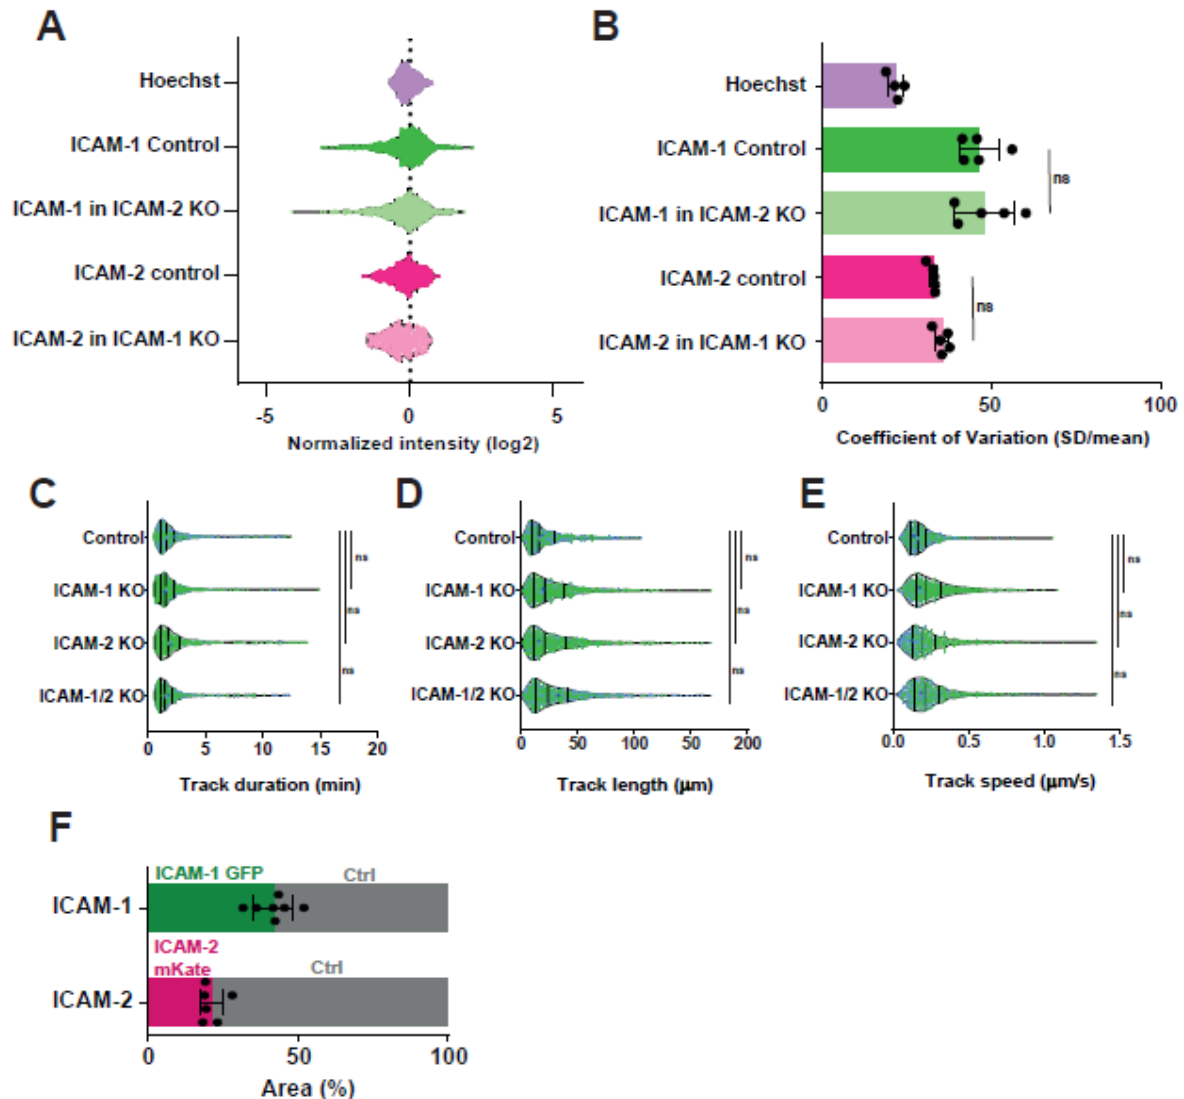

1035

1036

1037

1038

1039

1040

1041

1042

1043

1044

1045

1046

1047

**Figure S4.** *ICAM-1 and ICAM-2 knockout does not influence each other's heterogeneity and ICAM-1/2 KO BOECs do not have altered crawling dynamics.* **(A)** Violin plots displaying Log<sub>2</sub>-normalized fluorescent intensity of Hoechst in control (n = 488 cells), ICAM-1 in control (n = 611 cells) and in ICAM-2 KO BOECs (n = 497 cells), and ICAM-2 in control (n = 808 cells) and in ICAM-1 KO BOECs (n = 336 cells). Data is from 2 independent experiments **(B)** Bar graph displaying coefficients of variation (CoV) of all field of views measured in figure S4A. Mann-Whitney test between ICAM-1 stain conditions (p > 0.9999) and ICAM-2 stain condition (p = 0.0952). **(C,D,E)** Violin plots displaying neutrophil crawling duration, length and speed across control (n = 834 neutrophils), ICAM-1 KO (n = 1096 neutrophils), ICAM-2 KO (n = 1036 neutrophils) and ICAM-1/2 KO (n = 793 neutrophils) BOECs. Colours represent data from three independent experiments. Medians of three individual experiments are shown in bigger dots. Medians and quartiles of all data is displayed with vertical lines. One-way Paired ANOVA

1048 with multiple comparison correction, comparing all conditions with control. **(C)** Control vs  
1049 ICAM-1:  $p = 0.3906$ . Control vs ICAM-2:  $p = 0.9299$ . Control vs ICAM-1/2 KO:  $p = 0.4066$  **(D)**  
1050 Control vs ICAM-1:  $p = 0.6582$ . Control vs ICAM-2:  $p = 0.9073$ . Control vs ICAM-1/2 KO:  $p =$   
1051  $0.2270$  **(E)** Control vs ICAM-1:  $p = 0.0779$ . Control vs ICAM-2:  $p = 0.7565$ . Control vs ICAM-  
1052 1/2 KO:  $p = 0.0603$  **(F)** Quantification of area of heterogeneous EC monolayer composing of  
1053 ICAM-1/ICAM-2 KO ECs either non-expressing (ctrl, grey) or expressing ICAM-1-GFP (upper,  
1054 green) or ICAM-2-mKate (lower, magenta).  
1055



1056

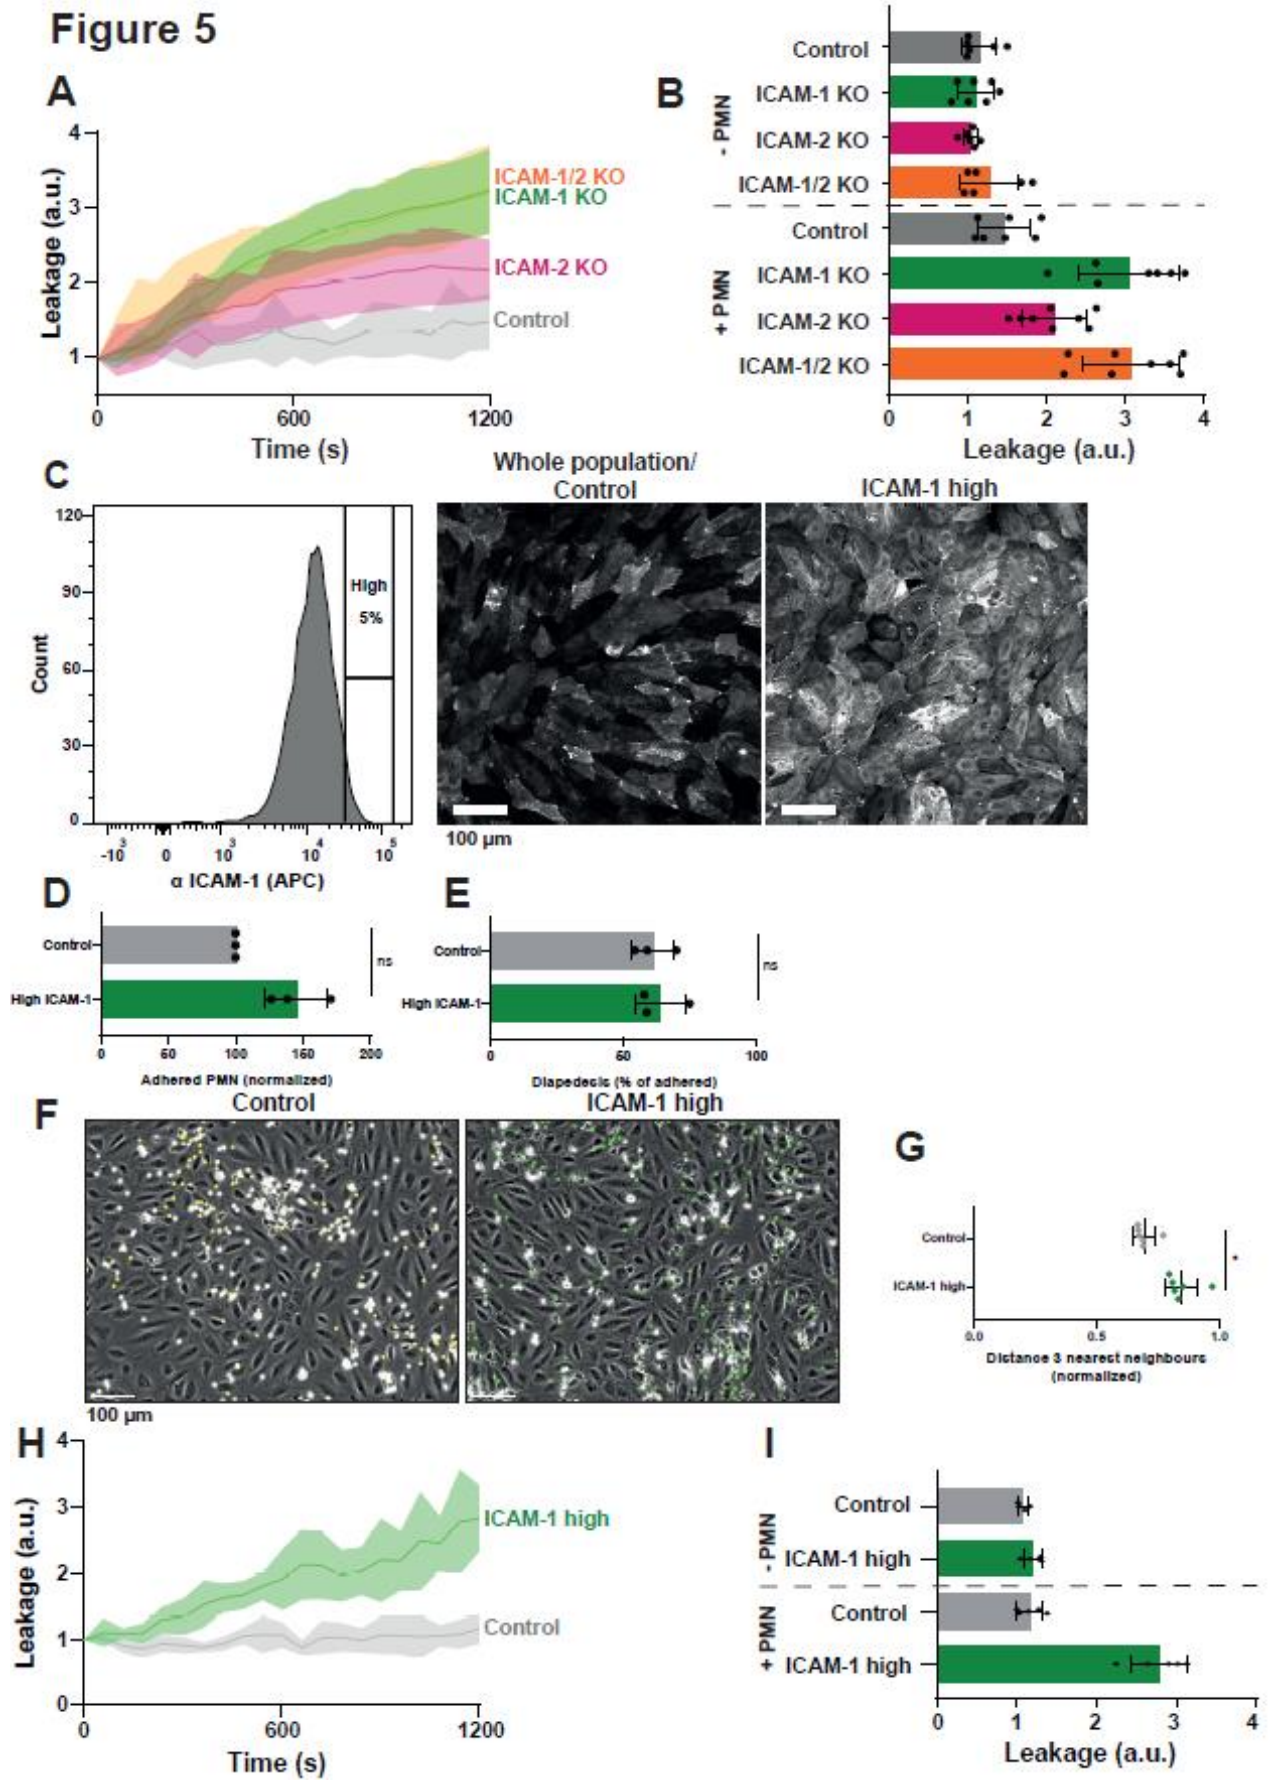

1057

1058 **Figure 5.** *ICAM-1 induced hotspots prevent vascular leakage.* **(A)** Texas-Red-dextran  
1059 extravasation kinetics through control (grey), ICAM-1 KO (green), ICAM-2 KO (magenta) and  
1060 ICAM-1/2 KO (orange) BOECs cultured on 3- $\mu$ m pore permeable filters. DiO-stained  
1061 neutrophils transmigrated towards C5a located in the lower compartment. Lines show means  
1062 with 95% CIs of a total of 6 to 8 wells from 3 independent experiments. **(B)** Quantification of  
1063 Texas-Red-dextran extravasation kinetics through control, ICAM-1 KO, ICAM-2 KO, and  
1064 ICAM-1/2 KO BOECs after 20 minutes. Bar graphs represent mean and SD. One-way ANOVA  
1065 with multiple comparison corrections was performed within both the conditions without and  
1066 with neutrophils. Without neutrophils (Control vs ICAM-1 KO:  $p = 0.9893$ , Control vs ICAM-2  
1067 KO:  $p = 0.8830$ , Control vs ICAM-1/2 KO:  $p = 0.7988$ , ICAM-1 KO vs ICAM-2 KO:  $p = 0.9689$ ,  
1068 ICAM-1 KO vs ICAM-1/2 KO:  $p = 0.5993$ , ICAM-2 KO vs ICAM-1/2 KO:  $p = 0.3768$ ). With  
1069 neutrophils (Control vs ICAM-1 KO:  $p < 0.0001$ , Control vs ICAM-2 KO:  $p = 0.1082$ , Control  
1070 vs ICAM-1/2 KO:  $p < 0.0001$ , ICAM-1 KO vs ICAM-2 KO:  $p = 0.0068$ , ICAM-1 KO vs ICAM-  
1071 1/2 KO:  $p = 0.9999$ , ICAM-2 KO vs ICAM-1/2 KO:  $p = 0.0042$ ). **(C)** FACS graph displaying the  
1072 top 5% sorted cells with the highest ICAM-1 expression levels based on fluorescence intensity.  
1073 These cells are now called ICAM-1 high. **(D)** Quantification of number of adhered neutrophils  
1074 (PMN) in TEM under flow assay using control HUVECs and ICAM-1 high HUVECs. Data is  
1075 normalized to control conditions (100%). Data consists of 3 independent experiments, 25646  
1076 total neutrophils measured. Bar graph displays mean with SD. Paired t-test:  $p = 0.0754$ . **(E)**  
1077 Quantification of transmigration efficacy of neutrophils (PMN) (total transmigrated / total  
1078 neutrophils detected \*100%) through control HUVECs and ICAM-1 high HUVECs. Data is  
1079 normalized to control conditions (100%). Data consists of 3 independent experiments, 25646  
1080 total neutrophils measured. Bar graph displays mean with SD. Paired t-test:  $p = 0.7923$ . **(F)**  
1081 Stills from neutrophil flow timelapses over control, and ICAM-1 high HUVECs. All neutrophil  
1082 TEM spots that occurred in the timelapse are shown in yellow (control) and green (ICAM-1  
1083 high). Scale bar, 100  $\mu$ m. **(G)** Medians of average distance of adhesion sites or TEM sites to  
1084 3 nearest neighbours, normalized against medians of the average distance to three nearest  
1085 neighbours of the corresponding randomly generated spots. Data of 6 videos from 3  
1086 independent experiments is shown. Mann-Whitney test:  $p = 0.0022$ . **(H)** Texas-Red-dextran  
1087 extravasation kinetics through control (grey) and ICAM-1 high sorted (green) HUVECs  
1088 cultured on 3- $\mu$ m pore permeable filters. DiO-stained neutrophils transmigrated towards C5a  
1089 located in the lower compartment. Lines show means with 95% CIs of a total of 4 (without  
1090 wells from 3 independent experiments). **(I)** Quantification of Texas-Red-dextran extravasation  
1091 kinetics through control and ICAM-1 high sorted HUVECs. Bar graph displays mean with SD.  
1092 Paired t-test was performed within conditions without and with neutrophils. Without neutrophils  
1093 (Control vs ICAM-1 high:  $p = 0.1271$ ). With neutrophils (Control vs ICAM-1 high:  $p < 0.0001$ ).

## Figure S5

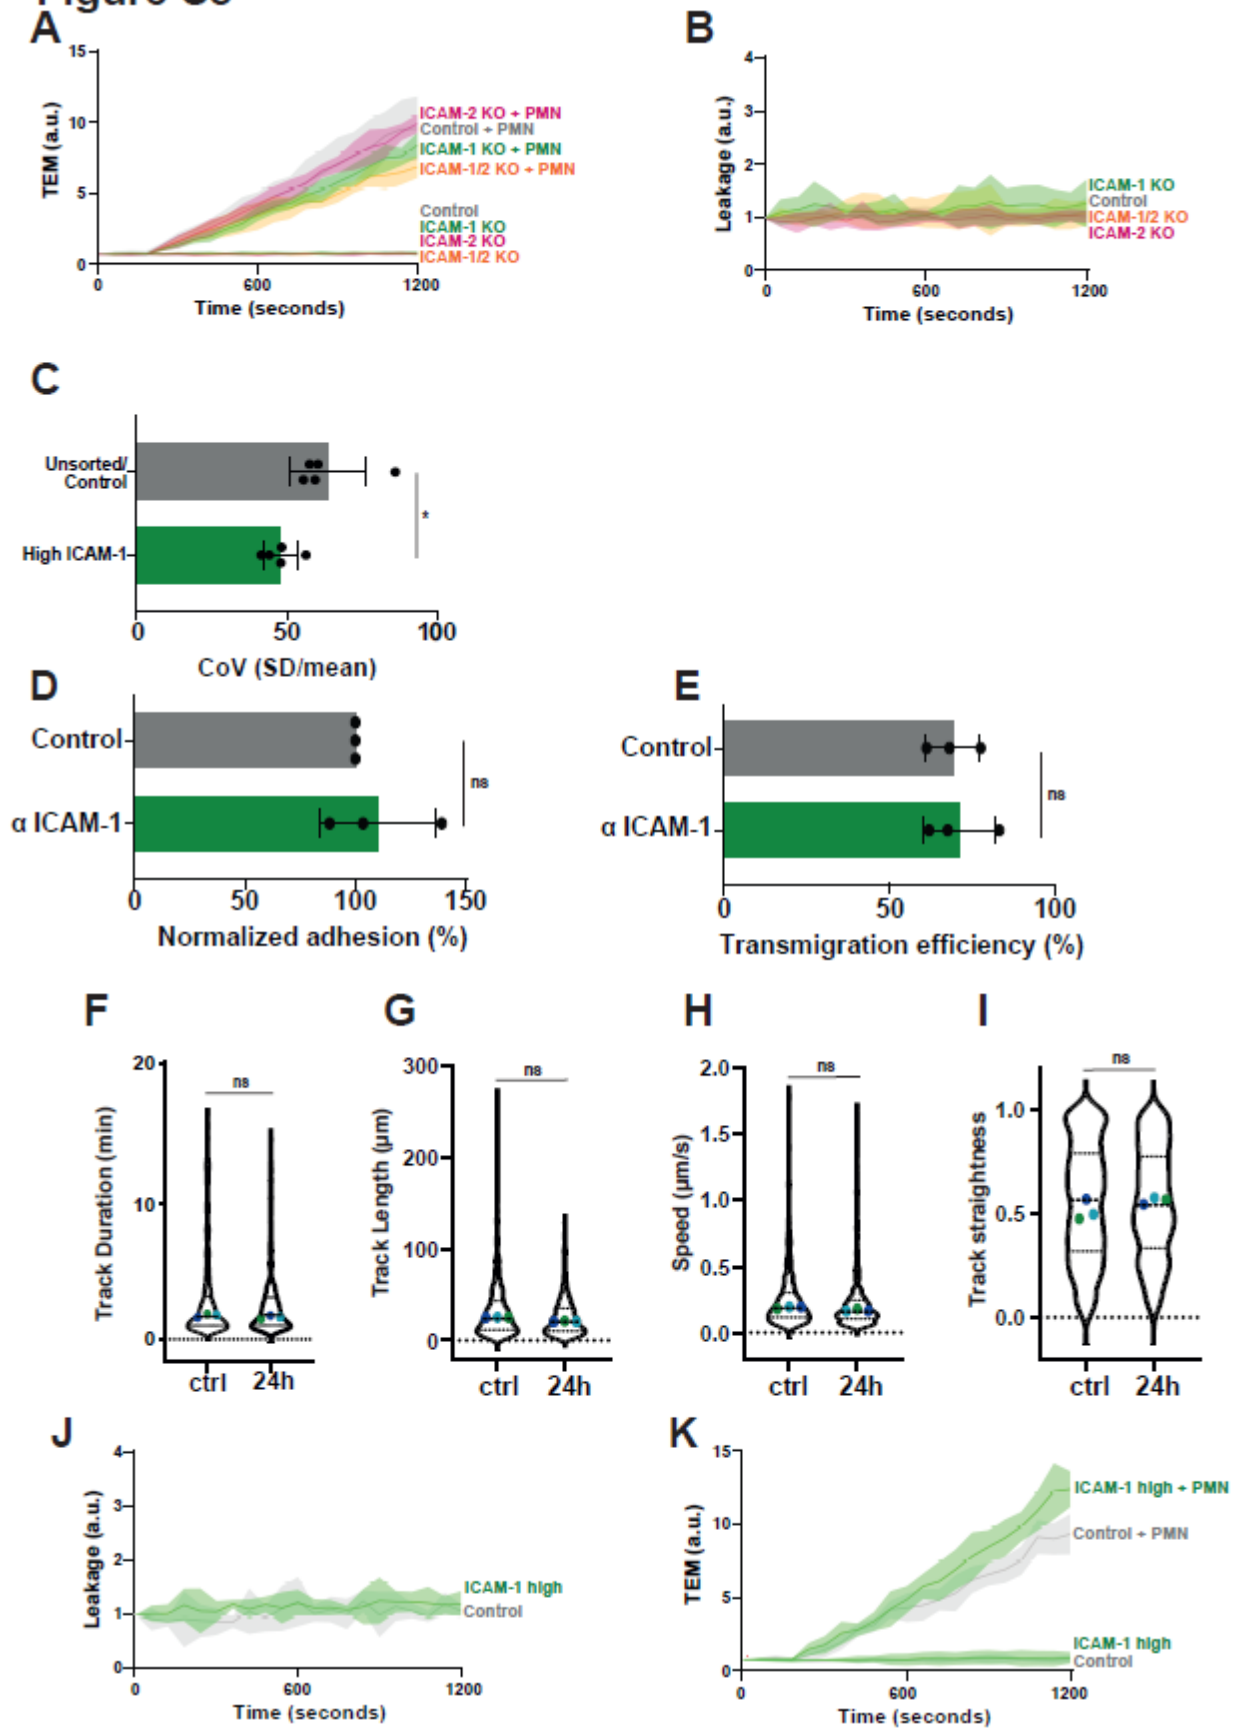

1095 **Figure S5.** *Antibody against ICAM-1 used for sorting does not affect neutrophil TEM*  
1096 *dynamics.* **(A)** Neutrophil extravasation kinetics through control (grey), ICAM-1 KO (green),  
1097 ICAM-2 KO (magenta) and ICAM-1/2 KO (orange) BOECs cultured on 3- $\mu$ m pore permeable  
1098 filters. DiO-stained neutrophils transmigrated towards C5a located in the lower compartment.  
1099 Lines show means with 95% CIs of a total of 6 to 8 wells from 3 independent experiments. **(B)**  
1100 Basal leakage measured with Texas-Red-dextran extravasation kinetics through control  
1101 (grey), ICAM-1 KO (green), ICAM-2 KO (magenta) and ICAM-1/2 KO (orange) BOECs. Lines  
1102 show means with 95% CIs of a total of 6 to 8 wells from 3 independent experiments. **(C)** Bar  
1103 graphs of Coefficient of Variation (CoV) of unsorted control and ICAM-1 high HUVECs. Mann-  
1104 Whitney test:  $p = 0.0159$ . **(D)** Quantification of number of adhered neutrophils (PMN) in TEM  
1105 under flow assay using control HUVECs and HUVECs incubated for 24 hours with an  $\alpha$ ICAM-  
1106 1 antibody. Data is normalized to control conditions (100%). Data consists of 3 independent  
1107 experiments, 7038 total neutrophils measured. Bar graph displays mean with SD. Paired t-  
1108 test:  $p = 0.5646$ . **(E)** Quantification of transmigration efficacy of neutrophils (PMN) (total  
1109 transmigrated / total neutrophils detected \*100%) through control HUVECs and HUVECs  
1110 incubated for 24 hours with an  $\alpha$ ICAM-1 antibody. Data is normalized to control conditions  
1111 (100%). Data consists of 3 independent experiments, 7038 total neutrophils measured. Bar  
1112 graph displays mean with SD. Paired t-test:  $p = 0.6801$ . **(F,G,H,I)** Violin plots displaying track  
1113 duration, length, speed and straightness of neutrophils crawling on control HUVECs (629  
1114 neutrophils measured) and HUVECs (486 neutrophils measured) incubated for 24 hours with  
1115 an  $\alpha$ ICAM-1 antibody. Medians and quartiles are shown, and three dots are medians of each  
1116 independent experiment. Paired t-test on the medians. **(F)**  $p = 0.4094$  **(G)**  $p = 0.2226$  **(H)**  $p =$   
1117  $0.2736$  **(I)**  $p = 0.9957$  **(J)** Neutrophil extravasation kinetics through control (grey) and ICAM-1  
1118 high sorted (green) HUVECs cultured on 3- $\mu$ m pore permeable filters. DiO-stained neutrophils  
1119 transmigrated towards C5a located in the lower compartment. Lines show means with 95%  
1120 CIs of 3 wells from 3 independent experiments. **(K)** Basal leakage measured with Texas-Red-  
1121 dextran extravasation kinetics through control (grey) and ICAM-1 high sorted (green) HUVECs  
1122 BOECs. Lines show means with 95% CIs of 3 wells from 3 independent experiments.

## Figure 6

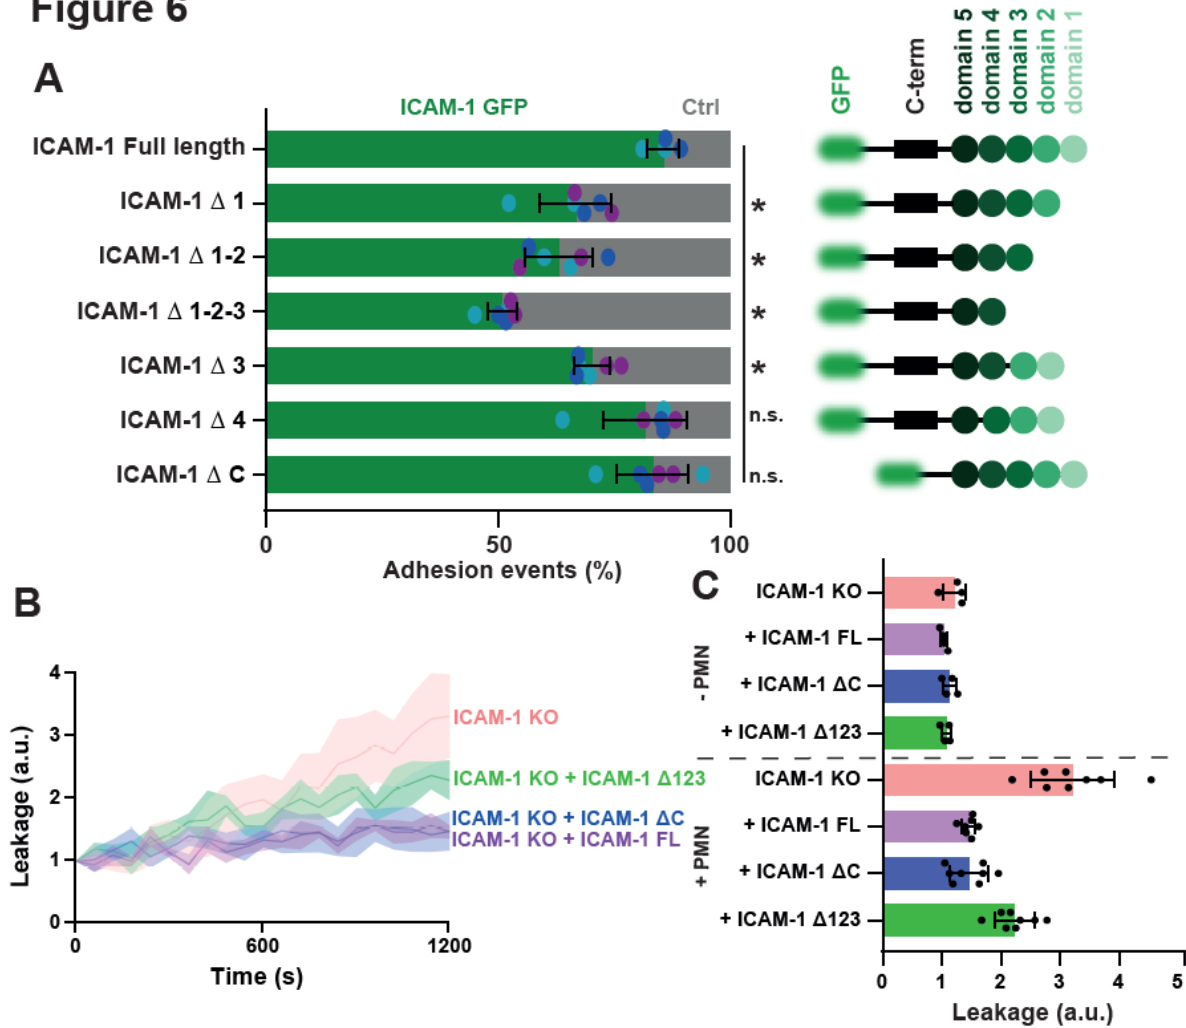

1123

1124

1125

1126

1127

1128

1129

1130

1131

1132

1133

1134

1135

1136

1137

1138

**Figure 6.** *Integrin-binding domains of ICAM-1 important for adhesion hotspots, the intracellular domain is not.* **(A)** Quantification of preference for neutrophils to adhere to ICAM-1-GFP truncations (green) expressed in ICAM-1/2 KO BOECs or ICAM-1/2 KO BOECs (Ctrl) (light grey). A schematic overview of all cloned ICAM-1 truncations is displayed as well. Bars represent the percentage of neutrophils that adhere to indicated transfected ECs. Numbers are corrected for area occupied. Dots are percentages from individual time lapse images. Bars represent mean with standard deviation. Colours represent data from 6 videos from 3 independent experiments (2 videos from 2 independent experiments for the control). One-way ANOVA with multiple comparison corrections, comparing all conditions to FL ICAM-1. FL vs  $\Delta 1$ :  $p = 0.0004$ . FL vs  $\Delta 12$ :  $p < 0.0001$ . FL vs  $\Delta 123$ :  $p < 0.0001$ . FL vs  $\Delta 3$ :  $p < 0.0029$ . FL vs  $\Delta 4$ :  $p = 0.5848$ . FL vs  $\Delta C$ :  $p = 0.6014$ . **(B)** Texas-Red-Dextran extravasation kinetics through ICAM-1/2 KO (pink) BOECs with mosaicly expressed ICAM-1-GFP (purple), ICAM-1-GFP  $\Delta 123$  (green) and ICAM-1-GFP  $\Delta C$  (blue), cultured on 3- $\mu$ m pore filters. DiO-stained neutrophils transmigrated towards C5a located in lower compartment. Lines show means with 95% CIs of a total of 4 (without neutrophils) or 8 (with neutrophils) wells from 3 independent



1139 experiments. **(C)** Quantification of Texas-Red-dextran extravasation kinetics through ICAM-  
1140 1/2 KO BOECs with mosaicly expressed ICAM-1-GFP, ICAM-1-GFP  $\Delta$ 123 and ICAM-1-GFP  
1141  $\Delta$ C, after 20 minutes. Bar graphs represent mean and SD. One-way ANOVA with multiple  
1142 comparison corrections was performed within both the conditions without and with neutrophils.  
1143 Without neutrophils (ICAM-1 KO vs FL:  $p = 0.1845$ , ICAM-1 KO vs  $\Delta$ C:  $p = 0.7368$ , ICAM-1  
1144 KO vs  $\Delta$ 123:  $p = 0.3441$ , FL vs  $\Delta$ C:  $p = 0.6674$ , FL vs  $\Delta$ 123:  $p = 0.9717$ ,  $\Delta$ C vs  $\Delta$ 123:  $p =$   
1145  $0.8883$ ). With neutrophils (ICAM-1 KO vs FL:  $p < 0.0001$ , ICAM-1 KO vs  $\Delta$ C:  $p < 0.0001$ ,  
1146 ICAM-1 KO vs  $\Delta$ 123:  $p = 0.0006$ , FL vs  $\Delta$ C:  $p > 0.9999$ , FL vs  $\Delta$ 123:  $p = 0.0057$ ,  $\Delta$ C vs  $\Delta$ 123:  
1147  $p = 0.0065$ ).  
1148

## Figure S6

**A**

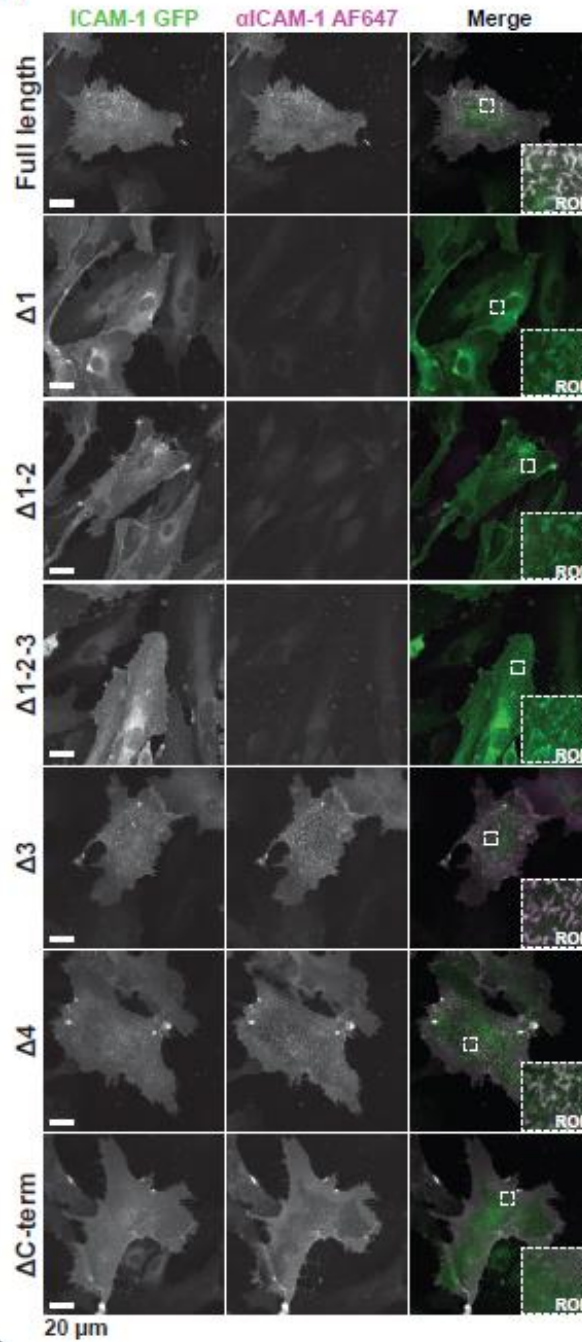

**B**

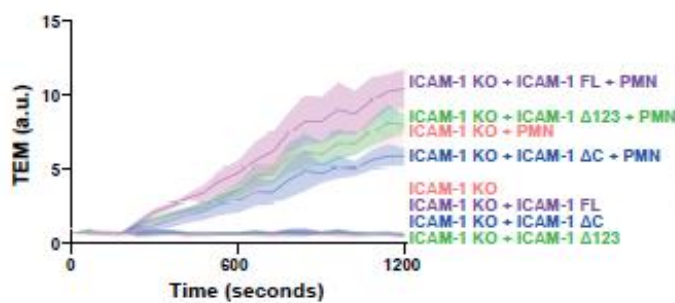

**C**

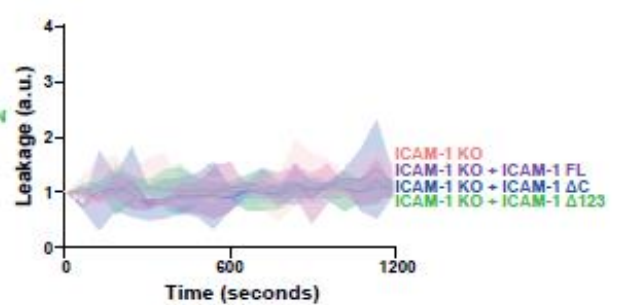

1150 **Figure S6.** *ICAM-1 truncations localization in ECs.* **(A)** Immunofluorescence staining for  
1151 ICAM-1 Ig-like extracellular domain 1 on all ICAM-1-GFP truncated proteins. Left panel shows  
1152 ICAM-1-GFP truncated proteins (green), middle panel shows IF staining for ICAM-1 Ig-like  
1153 domain 1 (magenta) and right panel is composite image of both. **(B)** Neutrophil extravasation  
1154 kinetics through ICAM-1/2 KO (pink) BOECs with mosaicly expressed ICAM-1-GFP (purple),  
1155 ICAM-1-GFP  $\Delta$ 123 (green) and ICAM-1-GFP  $\Delta$ C (blue), cultured on 3- $\mu$ m pore permeable  
1156 filters. DiO-stained neutrophils transmigrated towards C5a located in the lower compartment.  
1157 Lines show means with 95% CIs of a total of 4 (without neutrophils) or 8 (with neutrophils)  
1158 wells from 3 independent experiments. **(C)** Basal leakage measured with Texas-Red-dextran  
1159 extravasation kinetics through ICAM-1/2 KO (pink) BOECs with mosaicly expressed ICAM-1-  
1160 GFP (purple), ICAM-1-GFP  $\Delta$ 123 (green) and ICAM-1-GFP  $\Delta$ C (blue). Lines show means with  
1161 95% CIs of 4 wells from 3 independent experiments.  
1162

1163 **Table 1.** All primers used in this study.

| No                               | Sequence                                | Use                                                              |
|----------------------------------|-----------------------------------------|------------------------------------------------------------------|
| <i>Gibson cloning</i>            |                                         |                                                                  |
| 1                                | GAACCGTCAGATCCGATGGCTCCCAGCAGCCC        | ICAM-1 Δ1                                                        |
| 2                                | TTCTGGAGTCCAGTAGGCATTGCCAGGTCCTGG       |                                                                  |
| 3                                | TACTGGACTCCAGAACGGG                     |                                                                  |
| 4                                | TCACCATGGTGGCGACCGGTGGATCCAAGGGAG       |                                                                  |
| 1                                | GAACCGTCAGATCCGATGGCTCCCAGCAGCCC        | ICAM-1 Δ1-2                                                      |
| 5                                | AGTCGCTGGCAGGACGGCATTGCCAGGTCCTGG       |                                                                  |
| 6                                | GTCCTGCCAGCGACTCC                       |                                                                  |
| 4                                | TCACCATGGTGGCGACCGGTGGATCCAAGGGAG       |                                                                  |
| 7                                | GAACCGTCAGATCCGATGGCTCCCAGCAGCCC        | ICAM-1 Δ1-2-3                                                    |
| 8                                | CGCCGAAAGCTGTAGGCATTGCCAGGTCCTGG        |                                                                  |
| 9                                | TACAGCTTTCCGGCGCCC                      |                                                                  |
| 4                                | TCACCATGGTGGCGACCGGTGGATCCAAGGGAG       |                                                                  |
| 10                               | TTAGTGAACCGTCAGATCCGATGGCTCCCAGCAGCCC   | ICAM-1 Δ3                                                        |
| 11                               | TTGGGCGCCGAAAGCTGTAAAAGTCTGGAGCTGGTAGG  |                                                                  |
| 9                                | TACAGCTTTCCGGCGCCC                      |                                                                  |
| 12                               | GATCTACCGGTCCGGGAGGCGTGGCTTGTG          |                                                                  |
| 10                               | TTAGTGAACCGTCAGATCCGATGGCTCCCAGCAGCCC   | ICAM-1 Δ4                                                        |
| 13                               | AGTCGGGGCCATACAGGACAAAGCTGTAGATGGTCACTG |                                                                  |
| 14                               | GTCCTGTATGGCCCCGA                       |                                                                  |
| 15                               | CTTGCTCACCATGGTGGCGAGGGGAGGCGTGGCTTGTG  |                                                                  |
| 16                               | GAGATCGCTAGCATGGCTCCCAGCAGCCC           | ICAM-1 ΔC                                                        |
| 12                               | GATCTACCGGTCCGGGAGGCGTGGCTTGTG          |                                                                  |
| <i>Restriction-based cloning</i> |                                         |                                                                  |
| 17                               | TACATCTACGTATTAGTCATCGTCA               | pLV-mEos4b                                                       |
| 18                               | CCTCTACAAATGTGGTATGGCTGATTATGATC        |                                                                  |
| <i>Sequencing</i>                |                                         |                                                                  |
| 19                               | TACATCTACGTATTAGTCATCGTCA               | pLV-mEos4b                                                       |
| 20                               | GCTGGGCGCACATTCCCTTGATGAA               | PCR exon 2 ICAM-1<br>and sequencing to<br>confirm KO, fw primer. |
| 21                               | GACCCTACGAGCAAGTGGCAAAGATT              |                                                                  |
| 22                               | GAGCCAGACTGCCTCAATGGACAG                | PCR exon 4 ICAM-2<br>and sequencing to<br>confirm KO, fw primer. |
| 23                               | GAGGGGCTCTGTGTGCATTCAAGTAG              |                                                                  |

1164
